# Supplementary material
Source: PubMed Central journal article supplement (PMC5384717)
Supplement: NIHMS851268-supplement-Supplemental_Material.pdf [file NIHMS851268-supplement-Supplemental_Material.pdf]

## Supplementary Materials

### Materials and Methods

#### Bacterial culture and purification of LtxA

*Aa* strains HK1651 (ATCC 700685), SUNYab 75 (ATCC 43717), and CU1000 (Daniel H. Fine; Rutgers School of Dental Medicine, Newark, NJ) were grown aerobically in 2× YT medium at 37°C in CO<sub>2</sub>-enriched (5%) air. *S intermedius* PK2821 and *S oralis* 34, both from the NIDCR culture collection, were grown in brain-heart infusion broth at 37°C, 5% (v/v) CO<sub>2</sub>. *A defectiva* (ATCC 49176) was grown at 37°C, 5% (v/v) CO<sub>2</sub> in brain-heart infusion broth supplemented with 10% (v/v) horse serum and 10 µg/mL filter-sterilized pyridoxal hydrochloride.

The following organisms were grown in static 10-mL tubes at 37°C in N<sub>2</sub>/H<sub>2</sub>/CO<sub>2</sub> (90%/5%/5%). Filter-sterilized supplements were added to the media after autoclaving, and tubes were placed in anaerobic conditions overnight before inoculation. *P gingivalis* W83 was grown in Todd Hewitt broth supplemented with 5 µg/mL hemin and 1 µg/mL vitamin K. *P intermedia* (ATCC 15032) and *P micra* (ATCC 33270) were grown in Schaedler broth supplemented with hemin and vitamin K. *T forsythia* (ATCC 43037) was grown in Tryptic Soy broth supplemented with 10 µg/mL N-acetylmuramic acid. *T denticola* (ATCC 35405) was grown in GM-1 medium. *F nucleatum* (ATCC 10953) was grown in brain-heart infusion broth supplemented with 0.25% ammonium glutamate.

LtxA was purified as previously described (53). Briefly, *Aa* strain HK921 (serotype b) was grown in liquid culture, and LtxA was purified from the supernatant using an Äcta 900 Purifier system and gel permeation chromatography. LPS was removed using Polymyxin B activated

agarose. Lytic activity was determined using K562 cells with recombinant expression of  $\beta 2$  integrin in the form of  $\alpha_L\beta 2$ ,  $\alpha_M\beta 2$ , or  $\alpha_X\beta 2$ . Studies were done in triplicate with LtxA at 37°C for 1 h, at which point cell viability (median, SD) was determined by the CellTiter-Glo™ assay. Under these conditions, viability was decreased by 50% using LtxA at 0.3  $\mu\text{g}/\text{mL}$ .

### **In vitro stimulation of human leukocytes**

Peripheral blood neutrophils were isolated from healthy donor whole blood as previously described (2). Briefly, neutrophils were recovered by Ficoll gradient centrifugation. Erythrocytes were removed by hypotonic lysis, and cells were resuspended in HBSS 1x, HEPES 10 mM,  $\text{CaCl}_2$  1.5 mM (HBSS-Ca) at a final density of  $10 \times 10^6$  cells/mL. Peripheral blood mononuclear cells (PBMCs) were resuspended in HBSS-Ca. To obtain macrophages, PBMCs were fractionated by plastic adherence. Non-adherent lymphocytes were removed by washing plates, and monocytes differentiated for 14 days in RPMI-1640 medium. Leukocytes were incubated with 0-1000 ng/mL purified LtxA at 37°C and lysed in SDS sample buffer. In some experiments, neutrophils were incubated in parallel with PMA (Cayman), LPS from *P. gingivalis* (InvivoGen), or purified LtxA at a final concentration of 500 nM, 1000 ng/mL, and 300 ng/mL, respectively. After incubation for 3 h at 37°C, neutrophils were lysed in SDS sample buffer. For inhibitor treatment, neutrophils were preincubated with 10  $\mu\text{M}$  DPI (Cayman), 200  $\mu\text{M}$  Cl-amidine (Millipore), or 1.5 mM EDTA for 30 min before stimulation. For analysis of extracellular material released from lytic (LtxA-treated) and NETotic (PMA or LPS-treated) cells by SDS-PAGE, stimulated neutrophils were incubated with fresh buffer containing 10 U/mL micrococcal nuclease (Thermo Scientific) for 10 min at 37°C. Supernatants were collected in 1.5 mM EDTA,

centrifuged at 20,000 x *g* for 15 min to remove cell debris, and proteins were precipitated in 20% trichloroacetic acid (TCA). Precipitates were washed in acetone and resuspended in SDS sample buffer.

### **Incubation of human neutrophils with bacterial cells**

Bacterial cells were grown in solution, pelleted by centrifugation, and washed in HBSS. Bacteria were resuspended in HBSS-Ca and adjusted by optical density at 600 nm wavelength ( $OD_{600}$ ). PMNs ( $10 \times 10^6$  cells/mL) in HBSS-Ca were co-incubated with increasing amounts of bacteria at dilutions of 1-10  $\mu$ L of bacterial suspension/ 200  $\mu$ L HBSS-Ca. The final optical densities at a dilution of 3  $\mu$ L/ 200  $\mu$ L HBSS-Ca were  $OD_{600}=0.350$  for all bacterial species tested. Bacterial numbers were estimated using the  $OD_{600}$  as previously described (59) and expressed as bacterial cells per neutrophil. After incubation at 37°C, samples were immediately lysed in SDS sample buffer. Similarly, bacterial cells alone were incubated in parallel and lysed in sample buffer. For inhibition experiments, neutrophils were incubated with *Aa* HK1651 cells in the presence or absence of a blocking antibody directed against the C-terminal domain of LtxA (DAKO) or with antibody alone (53).

### **SDS-PAGE and immunoblotting**

GCF was collected using absorbent filter paper strips, and proteins were recovered by washing strips in SDS sample buffer containing  $\beta$ -mercaptoethanol. Leukocyte lysates and GCF samples were analyzed by SDS-PAGE. Immunoblotting was performed with antibodies to histone H3 (Abcam), citrullinated histone H3 (Abcam), myeloperoxidase (MPO) (R&D),

proteinase 3 (PR3) (Santa Cruz), or peptidylarginine deiminase type 4 (PAD4) (Sigma). Total protein citrullination was detected by anti-modified citrulline (AMC) immunoblotting as previously described (60). SuperSignal West Pico Chemiluminescent substrate (Thermo Fisher Scientific) was used for chemiluminescence detection. To ensure linear detection of total protein citrullination, the chemiluminescence signal was quantified electronically using a chemiluminescent imager (ProteinSimple).

### **Immunofluorescence staining**

Neutrophils ( $5 \times 10^5$  cells/50  $\mu$ L serum-free HBSS, HEPES 10 mM,  $\text{CaCl}_2$  1.5 mM) were plated onto standard microscope slides coated with poly-D-lysine (Sigma), and incubated for 30 min at 37°C to allow for cell attachment. Neutrophils were then incubated in the absence or presence of purified LtxA at 0.3  $\mu$ g/mL for 1-3 h at 37°C and fixed in 4% paraformaldehyde (PFA). Fixed cells were carefully washed in PBS and permeabilized in ice-cold acetone. Before antibody probing, cells were blocked in 5% normal goat serum (GS) and incubated with rabbit anti-histone H3 (citrulline R2 + R8 + R17) (Abcam) or with human serum in PBS 5% GS for 2 h at RT. Secondary antibodies against human (conjugated with Alexa Fluor 488) and rabbit IgG (conjugated with Alexa Fluor 495) (Life Technologies) were used to visualize antibody binding. Cells were mounted with ProLong Gold (Molecular Probes) plus DAPI. To visualize extracellular DNA, PMNs were fixed in 4% PFA without permeabilization and stained with SYTOX Green (Life Technologies).

## Mass spectrometric analysis

LtxA-treated human primary neutrophils were analyzed by AMC immunoblotting to confirm hypercitrullination. LtxA-treated neutrophils and untreated controls incubated in parallel were lysed in 1% SDS, 2 mM EDTA, and 1 mM PMSF, sonicated on ice for 20 cycles of 5 seconds, and centrifuged for 20 minutes at 20,000 x *g*. Sample supernatants were recovered, and proteins were precipitated in TCA and analyzed by liquid chromatography–mass spectrometry (LC-MS/MS) (Mass Spectrometry and Proteomics Facility, Johns Hopkins University School of Medicine) to identify deiminated residues (Proteome Discoverer). GCF protein reduced in SDS sample buffer was partially resolved by 1D SDS-PAGE, fixed in methanol and acetic acid, and subjected to in-gel digestion for LC-MS/MS characterization. GCF samples from individuals with periodontitis (n=4) and healthy controls without periodontitis (n=4) were processed in parallel and subjected to MS independently. Tryptic peptides were basic reverse phase (bRP) fractionated and analyzed by nanoLCMSMS-FTFT using reverse-phase chromatography on a nanoAcquity (Waters) interfaced with QExactive Plus (Thermo). Precursor isolation and higher-energy collisional dissociation (HCD) fragmentation were performed at 70000 and 35000 resolutions, respectively. Spectra were searched against a custom bacteria and human database, using Mascot (v2.5.1) through Proteome Discoverer (v1.4) applying MS2Processor. Mass spectra were analyzed by Scaffold PTM to confirm citrullination sites, and localization probabilities were calculated using the Ascore algorithm as previously described (49). Localization probabilities  $\geq 98\%$  were considered significant. The data were used to define the proteome and citrullinome contained in each sample. The information was then

aggregated to present the general spectra of citrullinated proteins and citrullinated autoantigens detected in GCF.

Hierarchical clustering of citrullinated proteins detected by MS in GCF samples from individuals with periodontitis and oral health as compared to RA SF (published datasets) (2, 8-10) was performed in Cluster 3.0 and visualized using Java TreeView. Values were normalized by protein and subjected to unsupervised hierarchical clustering (centroid linkage) to define patterns of protein modification (citrullinated vs. native expression) in individual compartments. Protein expression, modification status, and autoantigen classification were considered. GCF samples were also searched for peptides unique to periodontitis-associated bacterial species and commensal controls to define the microbial composition of the periodontal pocket in patients with periodontitis and controls without periodontitis.

#### **Anti-LtxA, anti-Aa serotype b, and anti-*P. gingivalis* antibody ELISA**

RA patients and controls (healthy individuals without clinical evidence of periodontal disease) were assayed for IgG serum antibodies to purified LtxA. Polystyrene plates were coated with 100 ng/well purified LtxA in PBS, pH 7.4, or PBS alone. Plates were blocked in PBS 0.1% Tween, 3% non-fat dry milk (PBS-TM). Sera were diluted at 1:1000 in PBS-TM 1% and assayed in duplicate. HRP-conjugated anti-human IgG was used as a secondary antibody (diluted at 1:20,000 in PBS-TM 1%). Antibody concentrations were calculated in reference to wells coated with a serial dilution of purified human IgG (Athens Research) and a serial dilution of high titer patient serum that served as standards. *Aa* strain HK1651 (serotype b) was propagated until smooth-colony, non-adherent cultures were obtained. Of note, the ability of the fixed-cell assay

to discriminate between periodontitis and periodontally healthy controls was lost when adherent cultures (rough phenotype) were used. *P. gingivalis* W83 was grown as outlined above. Bacterial cells were pelleted by centrifugation, washed in PBS 1x, pH 7.4, and adjusted to OD<sub>600</sub>=0.350. Bacteria were fixed on ice in 4% PFA and diluted at 1:100 in PBS 1x, pH 7.4 to coat ELISA plates.

### **DNA isolation and PCR for *LTXA* gene detection**

Microbial DNA was isolated from subgingival plaque samples collected from patients with periodontitis and healthy controls (no periodontal disease) using the MasterPure DNA Extraction Kit (Epicentre Biotechnologies) as previously described (61). Polymerase chain reaction was conducted to amplify the *LTXA* gene using 0.4 μM of primer (forward ltx3: 5'-GCCGACACCAAAGACAAAGTCT-3' and reverse ltx4 5'-GCCCATAACCAAGCCACATAC-3') as previously described (62). DNA isolated from *Aa* HK1651 and *Aa* SUNY ab75 cultures was used as a reference for JP2 and non-JP2 clones, respectively.

### **Cloning, expression, and immunoprecipitation (IP) of radiolabeled full-length and truncated LtxA.**

LtxA-encoding DNA was amplified from *Aa* SUNY ab75 and cloned into pcDNA3.1 (+). Truncated forms of LtxA were generated by PCR and cloned into pcDNA3.1 (+). <sup>35</sup>S-methionine-labeled proteins were generated by in vitro coupled transcription/translation (IVTT) using the TnT Quick system (Promega). <sup>35</sup>S-methionine-labeled LtxA products were diluted in IP buffer (20 mM Tris pH 7.4, 150 mM NaCl, 1 mM EDTA, 1% NP-40 Alternative) and incubated with

patient or control sera. Immune complexes were purified using Protein A agarose beads (Pierce). Samples were washed in IP buffer, and immunoprecipitates visualized by SDS-PAGE/ sodium salicylate fluorography.



## Supplementary Figures

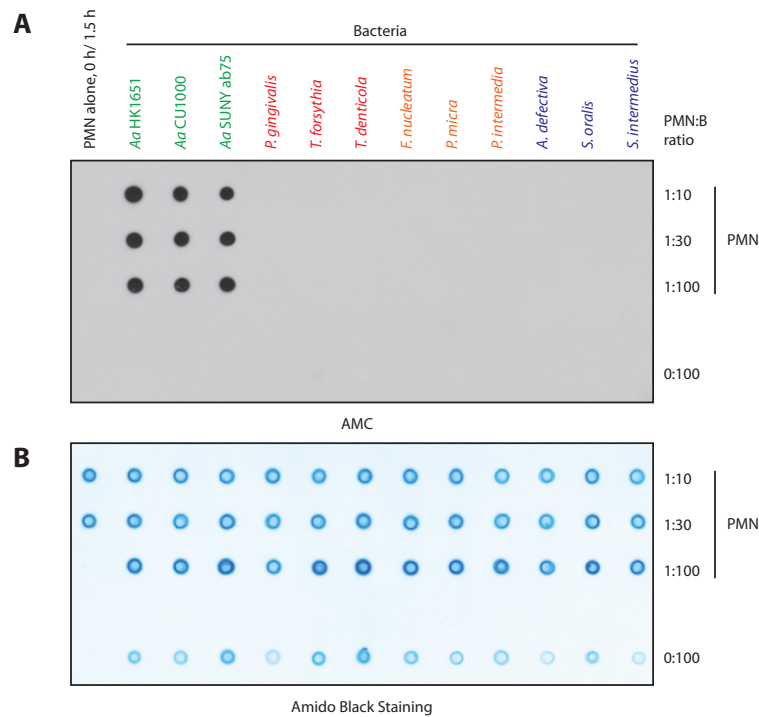

**Fig. S1. Protein citrullination is only detected in neutrophils co-incubated with *Aa* strains.**

(A) Dot blot analysis of neutrophils incubated alone (PMN alone, 0 h/ 1.5 h), of neutrophils incubated with increasing amounts of bacteria (10-100 bacterial cells per neutrophil), and of bacteria incubated alone to detect protein citrullination (AMC). Citrullination was only observed in *Aa*-exposed neutrophils (PMN), but not in neutrophils incubated with other bacterial species or in bacteria alone. (B) Amido black staining is shown to visualize protein loading. The experiments were performed on two separate occasions, with similar results.

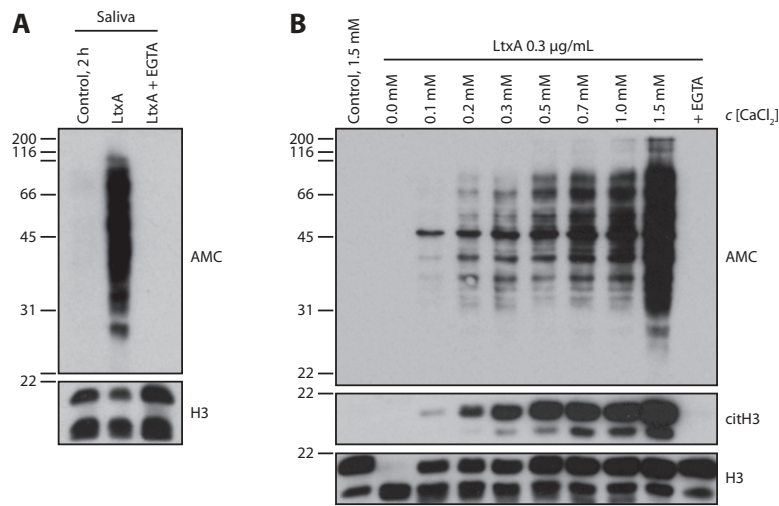

**Fig. S2. LtxA induces neutrophil hypercitrullination in human saliva and across a range of calcium concentrations.** (A) Neutrophils were incubated in human saliva (cleared by centrifugation) in the presence or absence of 0.3 µg/mL purified LtxA ± 5 mM EGTA. Total citrullinated protein (AMC) and histone H3 (H3) (loading control) were detected by immunoblotting. (B) Human neutrophils were incubated with purified LtxA at increasing concentrations of calcium (0.0-1.5 mM) or 5 mM EGTA (last lane). As control, neutrophils were incubated with 1.5 mM calcium in the absence of LtxA. Total citrullinated protein (AMC), citrullinated H3 (citH3), and histone H3 (H3) (loading control) were detected by immunoblotting. The experiments were performed on three (A) and two (B) separate occasions, with similar results.

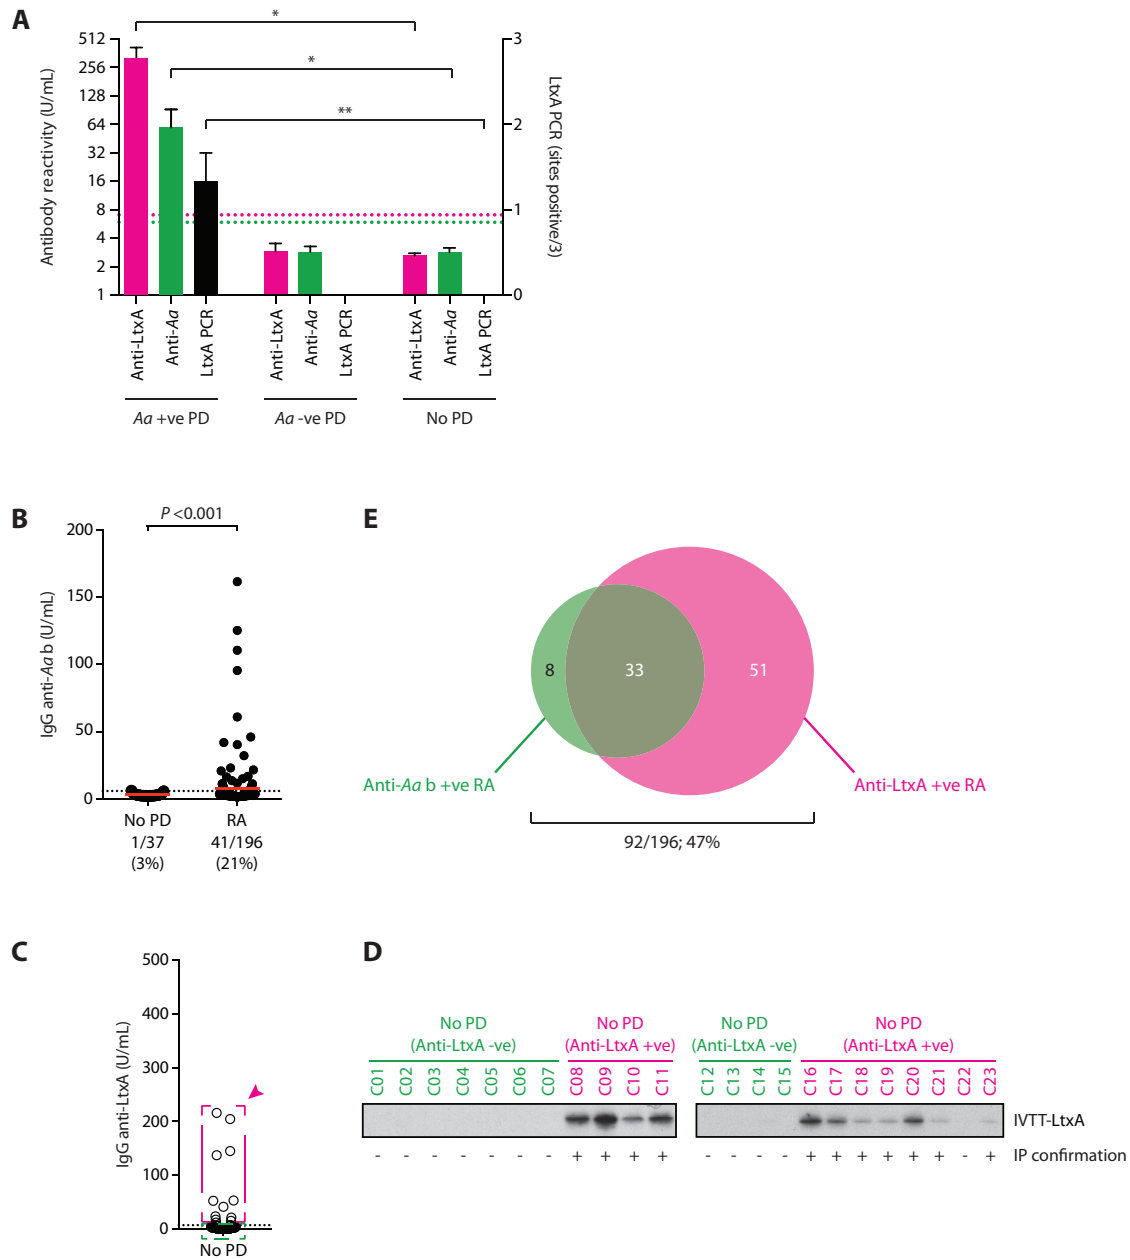

**Fig. S3. Antibodies against LtxA and *Aa* serotype b identify patients with active periodontitis associated with leukotoxic strains of *Aa*.** (A) Serum antibodies to LtxA and *Aa* (serotype b) were assessed by ELISA, and subgingival plaque *Aa* DNA was amplified by PCR in 6 patients with periodontitis (PD) and 8 controls without periodontitis (No PD). Antibodies to *Aa* and LtxA were only positive in a subgroup of periodontitis patients who were also positive for *Aa* DNA in subgingival plaque (*Aa*+ve PD group,  $n = 4$ ). Mean values  $\pm$ SEM are shown (Kruskal–Wallis test; \* $p=0.02$ , \*\* $p=0.006$ ). The pink and green dotted lines mark the cut-offs for positivity as determined by ELISA for antibodies against LtxA and *Aa*, respectively. (B) Antibodies against

PFA-fixed *Aa* serotype b in patients with RA ( $n = 196$ ) and healthy controls without periodontitis (No PD;  $n = 37$ ) as detected by ELISA. Red line indicates mean IgG concentration. The dotted line marks the 95<sup>th</sup> percentile of controls (cut-off for positivity) (Mann-Whitney test). **(C)** Reactivity of No PD control sera against purified LtxA by ELISA. Twelve No PD controls (pink box) demonstrated antibody reactivity. These sera were further interrogated in **D** by IVTT-immunoprecipitation (IP) to confirm antibody binding. **(D)** Reactivity against LtxA in No PD control sera positive for anti-LtxA antibodies by ELISA ( $n = 12$ ) was determined by IP using radiolabelled IVTT-LtxA. Anti-LtxA antibody negative individuals without periodontitis (No PD;  $n = 11$ ) were used as negative controls. 11/12 of No PD controls reactive by ELISA were also positive for anti-LtxA antibodies by IP, confirming that these healthy individuals were indeed exposed to leukotoxic strains of *Aa*. One sample with low-titer anti-LtxA antibodies by ELISA (15.1 U/mL) was negative by immunoprecipitation. **(E)** Venn diagram of anti-*Aa* serotype b and anti-LtxA antibody positive RA as determined by ELISA.

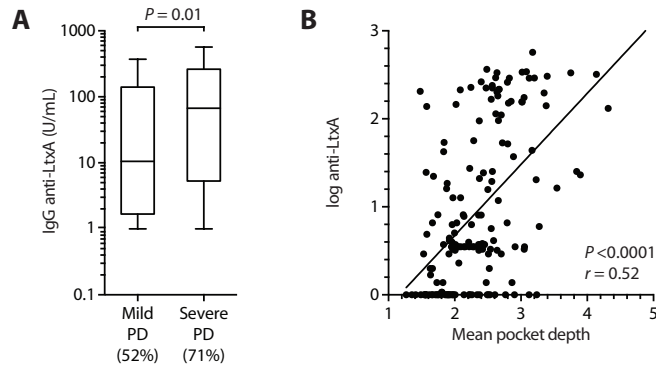

**Fig. S4. Anti-LtxA antibody concentrations correlate with periodontitis severity. (A)** Serum antibodies to LtxA in patients with mild versus severe periodontitis (PD). Box and whiskers plot (box indicates the median, 25<sup>th</sup> and 75<sup>th</sup> percentiles; whiskers mark the minimum to maximum values);  $P$  value calculated using Wilcoxon Rank-Sum test. **(B)** Scatter plot of log anti-LtxA antibodies versus mean pocket depth in patients with periodontitis ( $\beta = 1.12$ ;  $P < 0.0001$ ).

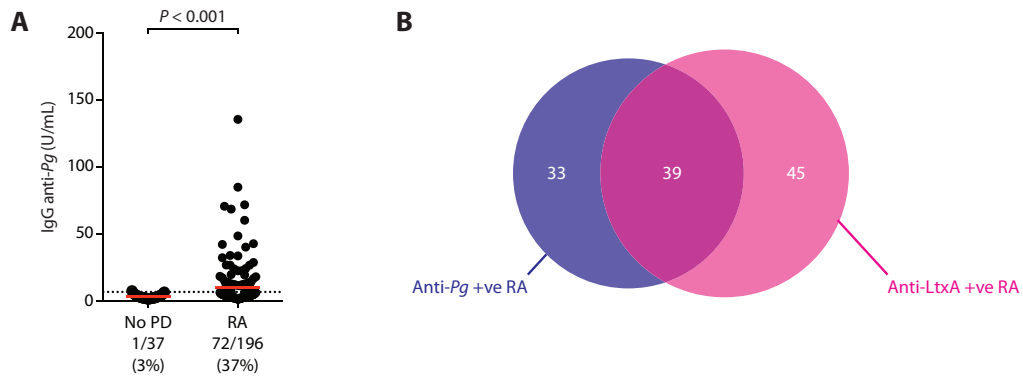

**Fig. S5.** Antibodies to *P. gingivalis* (*Pg*) are enriched in a subset of RA that largely differs from patients exposed to LtxA. **(A)** Antibodies against PFA-fixed *Pg* in patients with RA ( $n = 196$ ) and healthy controls without periodontitis (No PD;  $n = 37$ ) as detected by ELISA. Red line indicates mean IgG concentration. The dotted line marks the 95<sup>th</sup> percentile of controls (cut-off for positivity) (Mann-Whitney test). **(B)** Venn diagram of anti-LtxA and anti-*Pg* antibody positive RA as determined by ELISA. Anti-*Pg* and anti-LtxA antibodies overlapped in 39 patients with RA (39/196; 20%).

**Table S1. Specific bacterial peptides identified in GCF.**

S1A - *Aggregatibacter actinomycetemcomitans*

| Protein Name                                                                       | NCBI Ref. Sequence | Peptide Sequence             | Best Peptide Probability | Best Protein Probability | Exclusive Unique Peptides |
|------------------------------------------------------------------------------------|--------------------|------------------------------|--------------------------|--------------------------|---------------------------|
| <b>Branched-chain amino acid transport system II carrier protein</b>               | WP_005589245.1.    | LLQVTIPALLLIYPVAIMLVVLQMVRTK | 99.50%                   | 96.10%                   | 1                         |
| <b>Cell division protein FtsX</b>                                                  | WP_025298256.1.    | KFATLLTVLVIASFTIPTVSYLLR     | 99.40%                   | 97.20%                   | 1                         |
| <b>Iron ABC transporter permease</b>                                               | WP_005578275.1.    | ASSFQVLRFILLPLLKALLSALVTGFVR | 99.60%                   | 98.10%                   | 1                         |
| <b>Iron-dicitrate transporter subunit FecD</b>                                     | WP_053330367.1.    | LVGGRHRTLPAALLIGALLQISDILAR  | 99.60%                   | 98.00%                   | 2                         |
| <b>Membrane protein</b>                                                            | WP_005565029.1.    | VSPVFAGGVEYAILPELALR         | 99.70%                   | 99.80%                   | 6                         |
| <b>Membrane protein</b>                                                            | WP_005557524.1.    | QFITELQEK                    | 99.40%                   | 97.40%                   | 1                         |
| <b>Molybdate ABC transporter permease [hypothetical protein]</b>                   | WP_005578990.1.    | KLLIAMLLPPFNVLWLLSLFFSLIR    | 99.70%                   | 98.60%                   | 1                         |
| <b>Na(+)-translocating NADH-quinone reductase subunit E [hypothetical protein]</b> | WP_005542966.1.    | MKFLLLTLGIFLLIILAMALGYIVKR   | 99.20%                   | 97.20%                   | 1                         |
| <b>Protease modulator HflC</b>                                                     | WP_005576047.1.    | MRKLLPVILVIVAIYSSIVVTEGTR    | 99.60%                   | 98.10%                   | 1                         |
| <b>Sel1 domain protein repeat-containing protein [hypothetical protein]</b>        | WP_014702465.1.    | MKKCLKILLVLVLAIIGLVWLHR      | 99.30%                   | 97.70%                   | 1                         |
| <b>Tyrosine-specific transport protein 1</b>                                       | [ACX82440.1]       | VLGGNLTALAVALVGVITSHPLRHPR   | 99.50%                   | 97.70%                   | 1                         |
| <b>UDP-phosphate N-acetylglucosaminyl 1-phosphate transferase</b>                  | WP_005538677.1.    | LLTLIVTFWGAFLTLVLRPVAIR      | 99.30%                   | 97.70%                   | 2                         |
| <b>XylR family transcriptional regulator</b>                                       | WP_005594847.1.    | LLHRLLTGQKVATTTPLLIPPVKVIER  | 99.50%                   | 97.60%                   | 1                         |

NCBI Ref. Sequence, National Center for Biotechnology Information Reference Sequence [NCBI GenBank accession numbers are given when no ref. sequence is available]; Protein/Peptide Probability as determined by Scaffold (Proteome Software)

S1B - *Porphyromonas gingivalis*

| Protein Name                                                                   | NCBI Ref. Sequence | Peptide Sequence             | Best Peptide Probability | Best Protein Probability | Exclusive Unique Peptides |
|--------------------------------------------------------------------------------|--------------------|------------------------------|--------------------------|--------------------------|---------------------------|
| <b>Calcineurin-like phosphoesterase</b>                                        | WP_005873839.1.    | RGLMISLLLLVALGIWIAKRYR       | 98.70%                   | 100.00%                  | 2                         |
| <b>Hydrolase Nlp/P60</b>                                                       | WP_053444281.1.    | TVKRAVRIALLTLIGILFSSPSLVR    | 99.70%                   | 98.60%                   | 1                         |
| <b>Hypothetical protein</b>                                                    | WP_012457215.1.    | KQVIVILLVSLAYLGSVQVARFLYGR   | 99.00%                   | 96.50%                   | 1                         |
| <b>Hypothetical protein HMPREF1555_01833</b>                                   | [ERJ64501.1]       | MQLIKVFLVQLLLPIFFYKR         | 99.30%                   | 97.70%                   | 1                         |
| <b>Hypothetical protein HMPREF1989_00976</b>                                   | [ERJ86808.1]       | RGKVSLENLLPR                 | 99.40%                   | 97.60%                   | 1                         |
| <b>Hypothetical protein HMPREF1990_02184</b>                                   | [ERJ85621.1]       | TGSKIIILFILIRNILLYCLSVR      | 99.70%                   | 98.60%                   | 1                         |
| <b>Lactate permease</b>                                                        | WP_054191174.1.    | LTAKKAADTSVALEK              | 98.80%                   | 95.40%                   | 2                         |
| <b>Sugar isomerase</b>                                                         | WP_005875317.1.    | EYKNVLIVKLLLAIKIIAQIALR      | 99.70%                   | 98.60%                   | 1                         |
| <b>TonB-dependent receptor</b>                                                 | WP_021677449.1.    | MKRLISRTLWLLLILCIPISLAAQR    | 99.50%                   | 97.60%                   | 1                         |
| <b>TonB-dependent receptor</b>                                                 | WP_058018781.1.    | RKRILQLFLTLLALGSSLAIAQTVVTGK | 99.10%                   | 95.30%                   | 1                         |
| <b>Transporter, small conductance mechanosensitive ion channel MscS family</b> | [EOA11822.1]       | VVIALVAFYLGKLLLNALVKWLDRLMVR | 99.30%                   | 97.40%                   | 1                         |
| <b>UDP-N-acetylglucosamine 1-carboxyvinyltransferase</b>                       | WP_061156788.1.    | GSVLLVGPLISR                 | 99.70%                   | 98.40%                   | 2                         |

NCBI Ref. Sequence, National Center for Biotechnology Information Reference Sequence [NCBI GenBank accession numbers are given when no ref. sequence is available]; Protein/Peptide Probability as determined by Scaffold (Proteome Software)



S1C - *Tannerella forsythia*

| Protein Name                                                          | NCBI Ref. Sequence                                                       | Peptide Sequence                       | Best Peptide Probability | Best Protein Probability | Exclusive Unique Peptides |
|-----------------------------------------------------------------------|--------------------------------------------------------------------------|----------------------------------------|--------------------------|--------------------------|---------------------------|
| <b>AraC family transcriptional regulator</b>                          | WP_060828652.1;<br>WP_046825421.1;<br>WP_014225969.1.                    | TEKRVILIAGIALVAVLLLVMAVVIYMGR          | 99.00%                   | 99.80%                   | 2                         |
| <b>Bacterial group 2 Ig-like protein [hypothetical protein]</b>       | WP_060831565.1;<br>WP_060828264.1;<br>WP_014225980.1.                    | MKRLILLTLLTIGWIGATNTRLR                | 98.90%                   | 96.10%                   | 1                         |
| <b>Collagen-binding protein</b>                                       | WP_052449125.1;<br>WP_014225582.1.                                       | VYWQHSPYNTPTVR                         | 99.70%                   | 98.90%                   | 2                         |
| <b>DNA starvation/stationary phase protection protein</b>             | WP_014225577.1;<br>WP_046826198.1.                                       | IAMLGGHPENR                            | 99.70%                   | 98.60%                   | 2                         |
| <b>DNA-directed RNA polymerase subunit alpha</b>                      | WP_014224923.1.                                                          | IEGVDHEFATIPGVMEDVTNIIINLK             | 99.70%                   | 98.80%                   | 2                         |
| <b>Ferritin</b>                                                       | WP_060828637.1;<br>WP_014225642.1.                                       | IVTGLINDLYTLALQESDYATQSMLK             | 99.70%                   | 98.80%                   | 2                         |
| <b>Flavodoxin</b>                                                     | WP_014225386.1.                                                          | IAEQMNIASEDVYEVAK<br>TAIIYGSTGTTENIAGR | 99.70%<br>99.70%         | 99.00%<br>100.00%        | 4<br>11                   |
| <b>Forsythia cell detaching factor protein [hypothetical protein]</b> | WP_060830860.1;<br>WP_046825757.1;<br>WP_060827711.1;<br>WP_014224776.1. | LTSSVKPIVDTQK                          | 99.70%                   | 98.40%                   | 1                         |
| <b>Fructose-bisphosphate aldolase</b>                                 | WP_041590974.1.                                                          | LVPPLAFDILEAVEK                        | 99.70%                   | 100.00%                  | 23                        |
| <b>Glycosyl hydrolase</b>                                             | WP_046824980.1;<br>WP_014225135.1.                                       | TQPSYISAPEYQILDNANHPDAK                | 99.70%                   | 99.40%                   | 5                         |
| <b>Hypothetical protein</b>                                           | WP_014225175.1.                                                          | ITEQDQQLHR                             | 99.70%                   | 98.90%                   | 2                         |

|                                                                           |                                                      |                                        |        |         |    |
|---------------------------------------------------------------------------|------------------------------------------------------|----------------------------------------|--------|---------|----|
| <b>Hypothetical protein</b>                                               | WP_014225890.1                                       | APVMGSIYTDVTSGTAVTSNSLASK              | 99.70% | 98.80%  | 2  |
| <b>Hypothetical protein</b>                                               | WP_014226123.1                                       | IYMDSNNSTK                             | 99.70% | 98.40%  | 1  |
| <b>Hypothetical protein</b>                                               | WP_041590592.1                                       | EMANLTPEQSQK                           | 99.70% | 100.00% | 6  |
|                                                                           |                                                      | VAAGDAEATQK                            | 99.70% | 100.00% | 11 |
|                                                                           |                                                      | VQDLAADLQK                             | 99.50% | 100.00% | 3  |
| <b>Hypothetical protein</b>                                               | WP_041591050.1                                       | AFADAITDLLGDLLVEKF                     | 99.70% | 98.80%  | 2  |
| <b>Hypothetical protein</b>                                               | WP_046825066.1;<br>WP_060827931.1;<br>WP_014225330.1 | LSPYIGGDIGLAYQTQSSSSKPK                | 99.70% | 98.50%  | 1  |
| <b>Hypothetical protein</b>                                               | WP_046826079.1;<br>WP_014224394.1                    | IPEAANYHYIR                            | 99.70% | 98.40%  | 1  |
| <b>Hypothetical protein</b>                                               | WP_060830884.1                                       | VNKPTNAGVLNIK                          | 99.70% | 100.00% | 7  |
|                                                                           |                                                      | HADNIYLYQDANHPHPFASAFGGLGEFAH<br>TGITK | 99.70% | 100.00% | 7  |
| <b>Hypothetical protein</b>                                               | WP_060831299.1                                       | MTHEVANVDMAEMRR                        | 99.50% | 99.70%  | 4  |
| <b>Hypothetical protein</b>                                               | WP_060831356.1;<br>WP_014225605.1                    | LNNFLTLDQEK                            | 98.30% | 99.50%  | 2  |
| <b>Hypothetical protein</b>                                               | WP_060831494.1;<br>WP_046824471.1                    | SLILRNIDSEGIILTLVKKNR                  | 99.00% | 96.70%  | 1  |
| <b>Hypothetical protein</b>                                               | WP_060831874.1                                       | ASTDPSGIDAEASLKK                       | 99.30% | 96.30%  | 1  |
|                                                                           |                                                      | VPAGVYEASATDTR                         | 99.50% | 97.40%  | 1  |
| <b>Hypothetical protein TF3313_1200/ hypothetical protein BFO_1336</b>    | [BAR48735.1;<br>AEW20591.1]                          | VNNAFGAGESSYITPGNHAEQK                 | 99.70% | 100.00% | 7  |
| <b>Hypothetical protein TF3313_2048/ hypothetical protein TF3313_2046</b> | [BAR49513.1;<br>BAR49511.1]                          | TYKILLILSLIGVMQLVQAQHILK               | 99.30% | 97.00%  | 1  |
| <b>Integration host factor subunit beta</b>                               | WP_041590922.1                                       | NAVLASVESFMSVVK                        | 99.70% | 100.00% | 6  |

|                                                                        |                                                       |                           |        |         |    |
|------------------------------------------------------------------------|-------------------------------------------------------|---------------------------|--------|---------|----|
| <b>Iron ABC transporter</b>                                            | WP_046472598.1;<br>WP_037983921.1.                    | QKLLLLVPGSKPRELIVPREPLK   | 98.00% | 98.40%  | 2  |
| <b>Lipid A biosynthesis (KDO)2-(lauroyl)-lipid IVA acyltransferase</b> | WP_060827663.1;<br>WP_014224679.1.                    | ITFSVNVNR                 | 99.60% | 97.90%  | 1  |
| <b>Malate dehydrogenase</b>                                            | WP_014223968.1                                        | GNAEVAEQLGK               | 99.60% | 100.00% | 4  |
| <b>Membrane protein</b>                                                | WP_041590550.1.                                       | EFEVLEPMDYDLLNDLNSQINALR  | 99.70% | 100.00% | 16 |
|                                                                        |                                                       | FIPFVGLGYALRPGYSKD        | 99.70% | 100.00% | 27 |
|                                                                        |                                                       | IAPSGAISIGK               | 99.70% | 100.00% | 23 |
|                                                                        |                                                       | IDKHQEVSFNTAEYAK          | 99.70% | 100.00% | 20 |
|                                                                        |                                                       | KEFEVLEPMDYDLLNDLNSQINALR | 99.50% | 100.00% | 10 |
|                                                                        |                                                       | VVIMNTDDK                 | 99.60% | 100.00% | 20 |
|                                                                        |                                                       | WYNPYMAFR                 | 99.70% | 100.00% | 13 |
| <b>MFS transporter</b>                                                 | WP_046824671.1;<br>WP_060827113.1;<br>WP_014223608.1. | DFLALAADVIK               | 99.70% | 100.00% | 14 |
|                                                                        |                                                       | EYEDIAER                  | 98.80% | 96.00%  | 1  |
|                                                                        |                                                       | FYQEALKR                  | 99.00% | 100.00% | 5  |
|                                                                        |                                                       | GSASVDEHSTFGQGGGNVTK      | 99.70% | 100.00% | 9  |
| <b>Molecular chaperone GroEL</b>                                       | WP_046825748.1;<br>WP_060827723.1;<br>WP_014224796.1. | DLLPILEQVVQSGR            | 99.70% | 100.00% | 33 |
|                                                                        |                                                       | ISANGDEGIGK               | 99.70% | 100.00% | 16 |
|                                                                        |                                                       | VTVNKDNTTIVK              | 99.70% | 100.00% | 9  |
|                                                                        |                                                       | VVESIASQSEAVGTNMDR        | 99.70% | 100.00% | 16 |
| <b>Peptidase M16</b>                                                   | WP_014225081.1.                                       | MIVPNIPVEAINQIMQQIITDK    | 99.70% | 100.00% | 9  |
| <b>Peptidase M16 inactive domain protein [hypothetical protein]</b>    | WP_046824956.1;<br>WP_060831131.1;<br>WP_060827826.1. | GSITNETTDAER              | 99.70% | 100.00% | 8  |

|                                                       |                                                       |                                     |        |         |     |
|-------------------------------------------------------|-------------------------------------------------------|-------------------------------------|--------|---------|-----|
| <b>Peptidylprolyl isomerase</b>                       | WP_041591316.1.                                       | VITEGTGAKPTAEDQVK                   | 99.70% | 99.00%  | 5   |
| <b>Phosphoglycerate kinase</b>                        | WP_014223696.1.                                       | GLADDASEQEK                         | 99.70% | 99.00%  | 2   |
| <b>Phosphopyruvate hydratase</b>                      | WP_046825706.1;<br>WP_014225384.1.                    | GLSTAVGDEGGFAPALNGTEDALDSIIQAI<br>K | 99.70% | 100.00% | 8   |
| <b>Putative internalin-J</b>                          | WP_014223509.1.                                       | VIDVRQNLK                           | 99.70% | 97.80%  | 1   |
| <b>Putative lipoprotein [hypothetical protein]</b>    | WP_014225175.1.                                       | AQSTTELNEMLSTLNDIQTDIQAIR           | 99.70% | 100.00% | 6   |
|                                                       |                                                       | DGDGNLVLNILDQPQVFWLSK               | 99.70% | 100.00% | 6   |
|                                                       |                                                       | IQELDELVTSLNENVENLSVTAAQSQK         | 99.40% | 100.00% | 3   |
| <b>Putative lipoprotein [hypothetical protein]</b>    | WP_046825761.1;<br>WP_014224769.1.                    | IAPGFFQISDFLGGYYAQR                 | 99.70% | 98.90%  | 2   |
| <b>RNA polymerase subunit sigma-54</b>                | WP_014225268.1.                                       | VNDTFEEAVDDAVVALEK                  | 99.70% | 99.00%  | 2   |
| <b>S26 family signal peptidase</b>                    | WP_060827209.1.                                       | SQLCKIVNIALNVFNGISIIIGILLR          | 98.00% | 99.70%  | 2   |
| <b>Single-stranded DNA-binding protein</b>            | WP_060831578.1;<br>WP_014226022.1.                    | LANGTEIPER                          | 99.70% | 98.60%  | 2   |
| <b>Sodium bile acid symporter family protein</b>      | WP_060831660.1.                                       | KVFPLLILPLFVALAVRKWTPR              | 99.70% | 98.60%  | 1   |
| <b>Surface layer protein A [hypothetical protein]</b> | WP_041590756.1;<br>WP_046824918.1;<br>WP_060827793.1. | DLPLVGGNLIWK                        | 99.70% | 100.00% | 112 |
|                                                       |                                                       | GAYTDWIAEAETWNVK                    | 99.70% | 100.00% | 54  |
|                                                       |                                                       | IEYVQIYNDYELFK                      | 99.70% | 100.00% | 75  |
|                                                       |                                                       | LDENEVANMTPSYQWYVEQVNEGSSISK        | 99.70% | 100.00% | 85  |
|                                                       |                                                       | LVVAHKDEFDVNADFYKK                  | 99.30% | 100.00% | 21  |
|                                                       |                                                       | MQDLSAGER                           | 99.60% | 100.00% | 36  |
|                                                       |                                                       | TTVEGDLYTIK                         | 99.60% | 100.00% | 30  |
|                                                       |                                                       | VPGFATNK                            | 99.70% | 100.00% | 99  |
|                                                       |                                                       | VSAGQVNPFEQPLMAEDVTGTTGDK           | 99.70% | 100.00% | 158 |
|                                                       |                                                       | VSAGQVNPFEQPLMAEDVTGTTGDKQYL<br>NLK | 99.70% | 100.00% | 93  |

**Surface layer protein A [hypothetical protein]**

WP\_041590757.1;  
WP\_046824918.1;  
WP\_060827793.1.

|                              |        |         |     |
|------------------------------|--------|---------|-----|
| VTLQTATGPVDK                 | 99.70% | 100.00% | 178 |
| YLVVPMYAGNFTPQWLR            | 99.70% | 100.00% | 131 |
| YVTALAGNTEENYVNDLGYR         | 99.70% | 100.00% | 178 |
| EADGTETEYVNYK                | 99.70% | 100.00% | 36  |
| EADGTETEYVNYKK               | 99.70% | 100.00% | 86  |
| EYLYEDAHSIYSYDIK             | 99.70% | 100.00% | 30  |
| FTEVGGGSNKDFMIESETTR         | 99.70% | 100.00% | 129 |
| FTEVGGGSNKDFMIESETTRR        | 99.70% | 100.00% | 43  |
| FTLVNARPR                    | 99.70% | 100.00% | 73  |
| GAYTDWIAEAETWNVK             | 99.70% | 100.00% | 25  |
| GTGHIKPQYLLAVDPK             | 99.70% | 100.00% | 142 |
| HKDEVFSFR                    | 99.70% | 100.00% | 17  |
| KEADGTETEYVNYK               | 99.70% | 100.00% | 49  |
| KEADGTETEYVNYKK              | 99.70% | 100.00% | 49  |
| KGTDYIAPLER                  | 99.70% | 100.00% | 36  |
| KKEADGTETEYVNYKK             | 99.30% | 100.00% | 50  |
| LAGHPDGTIVDKDYIWDAK          | 99.70% | 100.00% | 178 |
| MIAPMNGGWVK                  | 99.00% | 100.00% | 50  |
| NEYLVLDDNGR                  | 99.70% | 100.00% | 73  |
| NHSSVNFLGVQNEDDAIANK         | 99.70% | 100.00% | 36  |
| NHSSVNFLGVQNEDDAIANKDKDQVFK  | 99.70% | 100.00% | 68  |
| NHSSVNFLGVQNEDDAIANKDKDQVFKR | 99.70% | 100.00% | 30  |
| NNSFGVVHASVDDLNNYVR          | 99.70% | 100.00% | 142 |
| RNEYLVLDDNGR                 | 99.70% | 100.00% | 49  |
| YGIGWTSNSPLK                 | 99.70% | 100.00% | 142 |

|                                                       |                                                       |                        |        |         |     |
|-------------------------------------------------------|-------------------------------------------------------|------------------------|--------|---------|-----|
| <b>Surface layer protein B [hypothetical protein]</b> | WP_041590758.1.                                       | YGYTPEVANAR            | 99.70% | 100.00% | 93  |
|                                                       |                                                       | EHLGAQLTSLIMGNLK       | 99.70% | 100.00% | 210 |
|                                                       |                                                       | EHLGAQLTSLIMGNLKK      | 99.70% | 100.00% | 55  |
| <b>Surface layer protein B [hypothetical protein]</b> | WP_060827794.1.                                       | AASGNIIPSSTGAAK        | 99.70% | 100.00% | 17  |
|                                                       |                                                       | ADAGTPNENDYLWGTAWNR    | 99.70% | 100.00% | 108 |
|                                                       |                                                       | AGAESPSVWK             | 99.70% | 100.00% | 136 |
|                                                       |                                                       | AGEFNPGVFVAAVEEQAPMK   | 99.70% | 100.00% | 235 |
|                                                       |                                                       | AWDVAPISQVGTAGNPWFSDVR | 99.70% | 100.00% | 217 |
| <b>Surface layer protein B [hypothetical protein]</b> | WP_060827794.1;<br>WP_046824919.1;<br>WP_041590758.1. | EAMPFALDKK             | 99.70% | 100.00% | 140 |
|                                                       |                                                       | EGGDFLIESETQDR         | 99.70% | 100.00% | 42  |
|                                                       |                                                       | FNQATFPSDGSMPMIGQFVWR  | 99.70% | 100.00% | 161 |
|                                                       |                                                       | FNTELEGDKPGDTPETVK     | 99.70% | 100.00% | 235 |
|                                                       |                                                       | FSPNGTPNPFTDQK         | 99.70% | 100.00% | 178 |
|                                                       |                                                       | IGAVTPGAGAPIDYSYYHR    | 99.70% | 100.00% | 193 |
|                                                       |                                                       | INGMLLFTLK             | 99.70% | 100.00% | 217 |
|                                                       |                                                       | KAGEFNPGVFVAAVEEQAPMK  | 99.20% | 100.00% | 42  |
|                                                       |                                                       | KIALNNNFHK             | 99.70% | 100.00% | 80  |
|                                                       |                                                       | KIGAVTPGAGAPIDYSYYHR   | 99.70% | 100.00% | 80  |
|                                                       |                                                       | KLDAASDSSPAAPK         | 99.70% | 100.00% | 122 |
|                                                       |                                                       | KNYLGLVSINSPNVK        | 99.70% | 100.00% | 80  |
|                                                       |                                                       | LDAASDSSPAAPK          | 99.70% | 100.00% | 98  |
|                                                       |                                                       | LVFTDAIHANDALYILGHADLK | 99.70% | 100.00% | 160 |
|                                                       |                                                       | LYVSLQNLTVDGKPGTR      | 99.70% | 100.00% | 137 |
|                                                       |                                                       | NAEASPINIINR           | 99.70% | 100.00% | 235 |
|                                                       |                                                       | NQVADLVQLK             | 99.70% | 100.00% | 235 |

|                                                            |                                                                          |                        |        |         |     |
|------------------------------------------------------------|--------------------------------------------------------------------------|------------------------|--------|---------|-----|
|                                                            |                                                                          | NVHPEELPSFQWIVEK       | 99.70% | 100.00% | 235 |
|                                                            |                                                                          | NYLFENTNALK            | 99.60% | 100.00% | 108 |
|                                                            |                                                                          | NYLFENTNALKDQQAYYR     | 99.70% | 100.00% | 137 |
|                                                            |                                                                          | NYLGLVSINSPNVK         | 99.70% | 100.00% | 137 |
|                                                            |                                                                          | QIVNSEVIDFEK           | 99.70% | 100.00% | 84  |
|                                                            |                                                                          | RFNTELEGDKPGDTPETVK    | 99.70% | 100.00% | 99  |
|                                                            |                                                                          | SDVLQAIADAEIFNVEK      | 99.70% | 100.00% | 235 |
|                                                            |                                                                          | SFETVLGTQASQEAR        | 99.70% | 100.00% | 235 |
|                                                            |                                                                          | SSSNPNAQTPGSISAWEFSEYK | 99.70% | 100.00% | 235 |
|                                                            |                                                                          | SWYFTAYPTPK            | 99.70% | 100.00% | 137 |
|                                                            |                                                                          | VKPYDNAKPTLK           | 99.70% | 100.00% | 132 |
|                                                            |                                                                          | VSIDPDLYLIR            | 99.70% | 100.00% | 235 |
|                                                            |                                                                          | YNEVIGTPLFFLR          | 99.70% | 100.00% | 217 |
|                                                            |                                                                          | YNQNGLSHPALQVPVDER     | 99.70% | 99.00%  | 8   |
|                                                            |                                                                          | YYQGQNPTFDFTNK         | 99.70% | 100.00% | 187 |
| <b>SusC/RagA family TonB-linked outer membrane protein</b> | WP_041590933.1;<br>WP_046826132.1.                                       | HWQKPGDNAEYAR          | 99.70% | 100.00% | 4   |
|                                                            |                                                                          | TQEAVAQPDMK            | 98.20% | 100.00% | 2   |
|                                                            |                                                                          | LNVLGHSFQR             | 99.70% | 100.00% | 8   |
|                                                            |                                                                          | NANMQNHQISVTSGGETTK    | 99.70% | 100.00% | 4   |
| <b>SusC/RagA family TonB-linked outer membrane protein</b> | WP_046825525.1;<br>WP_060830558.1;<br>WP_060827077.1;<br>WP_014223521.1. | HNISVEAGSDK            | 99.70% | 98.40%  | 1   |
| <b>SusC/RagA family TonB-linked outer membrane protein</b> | WP_046825759.1;<br>WP_014224771.1.                                       | AVPSGGQTSLHR           | 99.70% | 100.00% | 12  |
|                                                            |                                                                          | DPSSGYTSQISNLGDVR      | 99.70% | 100.00% | 23  |
|                                                            |                                                                          | FTPGAPNDGSSTANAGR      | 99.70% | 100.00% | 23  |

|                                                                |                                                                          |                           |        |         |    |
|----------------------------------------------------------------|--------------------------------------------------------------------------|---------------------------|--------|---------|----|
|                                                                |                                                                          | IIENEQVKPYVFLK            | 99.70% | 100.00% | 8  |
|                                                                |                                                                          | VAGVDISTAPGPGATQNVIR      | 99.70% | 100.00% | 12 |
|                                                                |                                                                          | VQINHDMATYK               | 99.70% | 100.00% | 8  |
|                                                                |                                                                          | YVAATIQNPGYPK             | 99.70% | 100.00% | 19 |
| <b>SusC/RagA family TonB-linked outer membrane protein</b>     | WP_060830766.1.                                                          | AAGVWIGSTGSPGSK           | 98.80% | 100.00% | 6  |
|                                                                |                                                                          | ASPWVPVYDIQGHFAGSK        | 99.70% | 100.00% | 6  |
|                                                                |                                                                          | ATNFISTYSTNPSR            | 99.70% | 100.00% | 6  |
| <b>SusC/RagA family TonB-linked outer membrane protein</b>     | WP_060830766.1;<br>WP_046825920.1;<br>WP_041590573.1;<br>WP_060830987.1. | TPSASATQQQLQGR            | 99.70% | 100.00% | 6  |
| <b>SusC/RagA family TonB-linked outer membrane protein</b>     | WP_060830987.1;<br>WP_060827529.1.                                       | ADLDALDPEVIDAFSVLK        | 99.60% | 100.00% | 5  |
|                                                                |                                                                          | NQVLEYDEAPGLRPALR         | 99.70% | 100.00% | 5  |
|                                                                |                                                                          | NVTDVLDIIFSGTGLAYR        | 99.70% | 100.00% | 8  |
|                                                                |                                                                          | QVSESGSPSKPNLNAGSGVSGDR   | 99.70% | 100.00% | 15 |
|                                                                |                                                                          | SLKPIVSNFK                | 99.50% | 100.00% | 5  |
| <b>SusC/RagA family TonB-linked outer membrane protein</b>     | WP_060830987.1;<br>WP_060827529.1;<br>WP_014224392.1.                    | ILSIPLSEDAQALGEVVSAFNTGQK | 99.70% | 100.00% | 8  |
| <b>SusC/RagA family TonB-linked outer membrane protein</b>     | WP_060831252.1;<br>WP_046824538.1;<br>WP_014225420.1;<br>WP_060827965.1. | ATPVVDDNNTYQPYSK          | 99.70% | 99.80%  | 3  |
|                                                                |                                                                          | FGFINSLR                  | 99.00% | 100.00% | 8  |
| <b>SusC/RagA family TonB-linked outer membrane protein</b>     | WP_060831791.1;<br>WP_060828570.1;<br>WP_052449072.1;<br>WP_014224606.1. | IIDEGIVNSGNNTLDDHGDLKR    | 99.70% | 98.60%  | 1  |
| <b>SusD and RagB outer membrane lipoprotein domain protein</b> | WP_060828127.1;<br>WP_060831380.1.                                       | IFVLPFHTDNPYKK            | 99.70% | 98.90%  | 2  |
| <b>SusD family protein [hypothetical protein]</b>              | WP_060830986.1;<br>WP_014224393.1.                                       | GAANPEVLFADTR             | 99.70% | 98.40%  | 1  |
|                                                                |                                                                          | LVYPWPVIR                 | 99.30% | 96.60%  | 1  |
| <b>T9SS C-terminal target domain-containing protein</b>        | WP_041590835.1.                                                          | LGANSAAEENQGLNR           | 99.60% | 97.50%  | 1  |



|                                                                |                                                                          |                       |        |         |   |
|----------------------------------------------------------------|--------------------------------------------------------------------------|-----------------------|--------|---------|---|
| <b>Tetratricopeptide repeat protein [hypothetical protein]</b> | WP_060830863.1;<br>WP_046825760.1;<br>WP_014224770.1.                    | VWWNVKPEIVVK          | 99.70% | 98.40%  | 1 |
| <b>TonB-dependent receptor</b>                                 | WP_060831832.1;<br>WP_046825715.1;<br>WP_060828609.1;<br>WP_014225392.1. | IAGEGALDNVDFSR        | 99.70% | 100.00% | 3 |
|                                                                |                                                                          | KANRPFVGTVSTR         | 99.20% | 100.00% | 3 |
| <b>Type I glyceraldehyde-3-phosphate dehydrogenase</b>         | WP_046825854.1;<br>WP_014223728.1.                                       | VPTLDVSVVDLTANLEKPATK | 99.70% | 100.00% | 9 |

NCBI Ref. Sequence, National Center for Biotechnology Information Reference Sequence [NCBI GenBank accession numbers are given when no ref. sequence is available]; Protein/Peptide Probability as determined by Scaffold (Proteome Software)

S1D - *Treponema denticola*

| Protein Name                                  | NCBI Ref. Sequence                                                                                                                                   | Peptide Sequence                          | Best Peptide Probability | Best Protein Probability | Exclusive Unique Peptides |
|-----------------------------------------------|------------------------------------------------------------------------------------------------------------------------------------------------------|-------------------------------------------|--------------------------|--------------------------|---------------------------|
| <b>Al-2E family transporter</b>               | WP_002681303.1;<br>WP_002676680.1;<br>WP_002672876.1;<br>WP_010688795.1;<br>WP_002687333.1;<br>WP_002684957.1;<br>WP_010698459.1;<br>WP_002692331.1. | LFLPYASVLLWSAVIYVLRPLYNKILSR              | 99.70%                   | 98.80%                   | 1                         |
| <b>Cobalt transporter</b>                     | WP_002668171.1.                                                                                                                                      | IKNLKSVLGLVPFVIMVLLPFVIR                  | 99.00%                   | 95.40%                   | 1                         |
| <b>Elongation factor Tu</b>                   | WP_002689871.1.                                                                                                                                      | VDLVDDPELVVEEVRETLK                       | 99.70%                   | 100.00%                  | 7                         |
| <b>Flagellar filament core protein</b>        | WP_010697276.1;<br>WP_002678135.1.                                                                                                                   | NQILSNTGVAMLAQANNNSQLVMSLLR               | 99.70%                   | 98.40%                   | 3                         |
| <b>Flagellar filament outer layer protein</b> | [AFD04804.1]                                                                                                                                         | EMIWNNSPSYVSHVK<br>MAQVDDQGNIQDPTDEDKASGK | 99.60%<br>99.70%         | 100.00%<br>100.00%       | 4<br>7                    |
| <b>Flagellar protein</b>                      | WP_002670927.1;<br>WP_002669397.1.                                                                                                                   | MAQVDDQGNLQEPTAEDK<br>MATEEGFTPSEGSEK     | 99.70%<br>99.70%         | 100.00%<br>100.00%       | 13<br>5                   |
| <b>Flagellin</b>                              | WP_002668952.1.                                                                                                                                      | NQILSNTGIAMLAQANNNSQLVMSLLR               | 99.70%                   | 100.00%                  | 6                         |
| <b>Flagellin</b>                              | WP_002670454.1                                                                                                                                       | GLNQASANAQNGISFIQVAEAFLETTDVI<br>QR       | 99.70%                   | 100.00%                  | 12                        |
| <b>Hypothetical protein</b>                   | WP_002676180.1.                                                                                                                                      | KDKFLLAK                                  | 99.50%                   | 97.90%                   | 2                         |
| <b>Hypothetical protein</b>                   | WP_002677442.1.                                                                                                                                      | VSFELLYSAPNHTER                           | 99.70%                   | 98.50%                   | 1                         |
| <b>Hypothetical protein</b>                   | WP_002678577.1.                                                                                                                                      | MKKNIILLSIFIFSLLVLYAKR                    | 99.70%                   | 98.60%                   | 3                         |
| <b>Hypothetical protein</b>                   | WP_002680619.1;<br>WP_002676079.1;                                                                                                                   | IKIALGISIILIFFLLGLVIGKYKER                | 99.70%                   | 98.60%                   | 1                         |

|                                                                |                                                                          |                               |        |         |   |
|----------------------------------------------------------------|--------------------------------------------------------------------------|-------------------------------|--------|---------|---|
|                                                                | WP_002673630.1;<br>WP_002684338.1;<br>WP_010698124.1;<br>WP_010689495.1. |                               |        |         |   |
| <b>Hypothetical protein</b>                                    | WP_002686836.1.                                                          | TWRIIALASLSFLFLSLLLLLYAIKLPK  | 99.60% | 98.10%  | 1 |
| <b>Hypothetical protein</b>                                    | WP_002687397.1;<br>WP_010698426.1;<br>WP_002692266.1.                    | TIQARPLVETLVLIAGLLINILAR      | 99.10% | 96.80%  | 1 |
| <b>Hypothetical protein</b>                                    | WP_002689432.1;<br>WP_010697066.1.                                       | FIILLVKNLIAKILNKNLNIR         | 99.70% | 98.60%  | 1 |
| <b>Hypothetical protein</b>                                    | WP_002693057.1.                                                          | NKLMIVFGLLILAVGFTLALLAVRTAR   | 99.20% | 97.10%  | 1 |
| <b>Hypothetical protein</b>                                    | WP_002693225.1.                                                          | VLFIVLTTILVCIMVILIMLGIGYLIR   | 99.50% | 97.70%  | 1 |
| <b>Hypothetical protein</b>                                    | WP_002693627.1.                                                          | LVNSVLPFIYGLILSVLSLGIIVKSIEVR | 99.70% | 98.60%  | 1 |
| <b>Hypothetical protein</b>                                    | WP_010692308.1.                                                          | MAKKSRLVLFVFAVIAIIR           | 99.70% | 98.60%  | 1 |
| <b>Hypothetical protein</b>                                    | WP_010692309.1.                                                          | KNIVGLLIYLIIVALFFSACSKR       | 98.60% | 95.20%  | 1 |
| <b>Hypothetical protein</b>                                    | WP_010692370.1.                                                          | SELIKKLVFVKPLSGVMTITVILR      | 99.70% | 98.60%  | 2 |
| <b>Hypothetical protein</b>                                    | WP_010693799.1.                                                          | FSLRNKLMIVFGLLITVGFILSVLAIR   | 99.60% | 98.00%  | 1 |
| <b>Hypothetical protein</b>                                    | WP_010693826.1.                                                          | AKKIVIVGGVAGGASVAARVR         | 98.80% | 99.60%  | 2 |
| <b>Hypothetical protein</b>                                    | WP_010694677.1.                                                          | IKLRKLLSNLISIGMSVFALFLIFVSPR  | 99.60% | 98.10%  | 1 |
| <b>Hypothetical protein</b>                                    | WP_010697464.1.                                                          | IIAAFLLVIIIVLFTSVLNKKHDR      | 99.30% | 97.70%  | 1 |
| <b>Hypothetical protein</b>                                    | WP_010698465.1.                                                          | KIKMPKFIAILFCVLIVLAVFYVLR     | 99.60% | 98.10%  | 1 |
| <b>Hypothetical protein</b>                                    | WP_010699674.1.                                                          | NALKLENIK                     | 99.70% | 97.40%  | 1 |
| <b>Hypothetical protein HMPREF9353_00988</b>                   | [EGC78141.1]                                                             | FGGGIFVK                      | 99.00% | 96.00%  | 1 |
| <b>Hypothetical protein HMPREF9353_01145</b>                   | [EGC78298.1]                                                             | LVIADVIVFTMITVSILLVKENKKR     | 99.20% | 97.30%  | 1 |
| <b>Long-chain-fatty-acid-CoA ligase [hypothetical protein]</b> | WP_010692313.1;<br>WP_010698915.1;<br>WP_002693047.1.                    | AGKITMLLGVPLLFNKLKLAGIFRGIR   | 98.90% | 95.10%  | 1 |
| <b>Major outer sheath protein [hypothetical protein]</b>       | WP_002681434.1;<br>WP_002676761.1;<br>WP_002672745.1;                    | FGSNGSWK                      | 99.00% | 100.00% | 7 |

|                                                                                 |                                                                                                                                   |                                |        |         |    |
|---------------------------------------------------------------------------------|-----------------------------------------------------------------------------------------------------------------------------------|--------------------------------|--------|---------|----|
|                                                                                 | WP_002685068.1;<br>WP_010688700.1;<br>WP_002687235.1;<br>WP_010693658.1.                                                          |                                |        |         |    |
| <b>Major surface protein [hypothetical protein]</b>                             | WP_002687235.1.                                                                                                                   | LGSKPVDGLALTLAMDALTNVGTDSK     | 99.70% | 100.00% | 13 |
| <b>Major surface protein/ major outer sheath protein [hypothetical protein]</b> | WP_002681434.1;<br>WP_002676761.1;<br>WP_002672745.1;<br>WP_002685068.1;<br>WP_010688700.1;<br>WP_002687235.1.                    | LNHLLSAVPTGDK                  | 99.70% | 100.00% | 12 |
|                                                                                 |                                                                                                                                   | VVIPLYMGLTNSK                  | 99.70% | 100.00% | 12 |
| <b>Major surface protein/ major outer sheath protein [hypothetical protein]</b> | WP_002681434.1;<br>WP_002676761.1;<br>WP_002672745.1;<br>WP_002685068.1;<br>WP_010688700.1;<br>WP_002687235.1;<br>WP_010693658.1. | LGYASDDLAGTGLK                 | 99.70% | 100.00% | 7  |
| <b>MATE efflux family protein</b>                                               | [EGC77779.1]                                                                                                                      | IPMLGILRIWLLRYIFILATER         | 98.90% | 95.00%  | 1  |
| <b>Methyl-accepting chemotaxis protein</b>                                      | WP_002681835.1.                                                                                                                   | IMIALISVLSGFLILTSIVLVKQLSGTSKR | 99.50% | 97.90%  | 1  |
| <b>Oligopeptide/dipeptide ABC transporter, ATP-binding protein</b>              | [EMB22321.1]                                                                                                                      | VILQNGLER                      | 98.90% | 95.50%  | 1  |
| <b>Peptide ABC transporter permease</b>                                         | WP_002670594.1.                                                                                                                   | TLLLFTTAFVINTLIGLALGLKKAQKPGSR | 98.50% | 98.90%  | 2  |
| <b>Peptide ABC transporter substrate-binding protein</b>                        | WP_002670584.1.                                                                                                                   | VVPSETELDQLLQGEVDMQLTSQGQAEK   | 99.70% | 99.80%  | 4  |
| <b>Signal peptidase II</b>                                                      | WP_010692516.1;<br>WP_002691525.1.                                                                                                | IMLVFLPFLLLIALTVAYLKSVELTR     | 99.50% | 97.70%  | 1  |
| <b>Signal peptidase II</b>                                                      | WP_010698126.1;<br>WP_002676082.1;<br>WP_002673628.1;<br>WP_002684345.1;<br>WP_002688035.1.                                       | ILLVFLPFLLLIALTVAYLKSVELTR     | 99.60% | 98.00%  | 1  |
| <b>Two-component sensor histidine kinase</b>                                    | WP_002687124.1.                                                                                                                   | LALRFSLLLAIIIVLSSGIILLRMNIR    | 99.60% | 98.00%  | 2  |
| <b>Two-component system response regulator</b>                                  | WP_002668975.1.                                                                                                                   | QIQQLNSEGYEVVATAVDGFEGVEK      | 99.70% | 98.80%  | 2  |
| <b>Two-component system response regulator</b>                                  | WP_002693807.1.                                                                                                                   | QIQQLNSEGYEVIATAVDGFEGVEK      | 99.70% | 98.50%  | 2  |

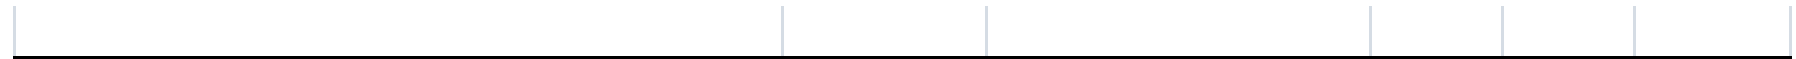

NCBI Ref. Sequence, National Center for Biotechnology Information Reference Sequence [NCBI GenBank accession numbers are given when no ref. sequence is available]; Protein/Peptide Probability as determined by Scaffold (Proteome Software)

S1E - *Parvimonas micra*

| Protein Name                                                     | NCBI Ref. Sequence                 | Peptide Sequence                        | Best Peptide Probability | Best Protein Probability | Exclusive Unique Peptides |
|------------------------------------------------------------------|------------------------------------|-----------------------------------------|--------------------------|--------------------------|---------------------------|
| <b>ATPase/histidine kinase/DNA gyrase B/HSP90 domain protein</b> | [EDP23616.1]                       | SRKKIILSIMGSIILFAVTLVILLASFR            | 99.60%                   | 98.00%                   | 1                         |
| <b>Hypothetical protein</b>                                      | WP_004832038.1.                    | GNKFFKIISILAVICIVFLSIFLR                | 99.70%                   | 98.60%                   | 1                         |
| <b>Hypothetical protein</b>                                      | WP_004832400.1.                    | NGKLPLTSNLIKNIHKILLNNVR                 | 99.50%                   | 97.70%                   | 1                         |
| <b>Hypothetical protein</b>                                      | WP_004833662.1.                    | TSVLIVLLAIFVAMVVTYLLSR                  | 99.50%                   | 97.50%                   | 1                         |
| <b>Hypothetical protein</b>                                      | WP_029948939.1                     | IVNIVLSVINIAGVCVHLIPNKIISVGMGK<br>DGAPR | 99.60%                   | 98.10%                   | 1                         |
| <b>Hypothetical protein</b>                                      | WP_029948950.1;<br>WP_004833498.1. | KLIFSSIGISLIGLIILLFFVLRGNFFR            | 99.00%                   | 96.60%                   | 1                         |
| <b>Hypothetical protein</b>                                      | WP_041953664.1;<br>WP_004832074.1. | TYLKVGFVFLMILIALDNLNLIKNSIKNK           | 99.60%                   | 97.90%                   | 1                         |
| <b>Hypothetical protein</b>                                      | WP_041953891.1.                    | SITNSNKIIDNIINKKIQDINVK                 | 99.70%                   | 98.40%                   | 1                         |

NCBI Ref. Sequence, National Center for Biotechnology Information Reference Sequence [NCBI GenBank accession numbers are given when no ref. sequence is available]; Protein/Peptide Probability as determined by Scaffold (Proteome Software)

S1F - *Prevotella intermedia*

| Protein Name                                                                     | NCBI Ref. Sequence                                    | Peptide Sequence           | Best Peptide Probability | Best Protein Probability | Exclusive Unique Peptides |
|----------------------------------------------------------------------------------|-------------------------------------------------------|----------------------------|--------------------------|--------------------------|---------------------------|
| <b>Conserved hypothetical protein with SusD domain</b>                           | WP_045167938.1.                                       | APITEEEATDVKK              | 99.70%                   | 97.90%                   | 2                         |
| <b>Flagellar protein FliS</b>                                                    | WP_044047581.1.                                       | LLGLIIGVICIITAGYIRQR       | 99.30%                   | 97.70%                   | 2                         |
| <b>Hypothetical protein</b>                                                      | WP_014709881.1.                                       | GLVKAVLLLLFGALLVGGVFSFNRYR | 98.50%                   | 95.00%                   | 1                         |
| <b>Hypothetical protein</b>                                                      | WP_051129504.1;<br>WP_050955385.1;<br>WP_045168207.1. | RKAIAIALLLSVLTVSAQEEIVR    | 99.30%                   | 97.60%                   | 1                         |
| <b>N-acetyltransferase B complex (NatB) non catalytic subunit domain protein</b> | WP_014709131.1;<br>WP_045166621.1.                    | LAELIADKQLKIALLTRAIATQR    | 99.50%                   | 97.70%                   | 1                         |
| <b>SusC/RagA family TonB-linked outer membrane protein</b>                       | WP_045167937.1.                                       | VQSQDQYTTAASDR             | 99.70%                   | 98.60%                   | 2                         |

NCBI Ref. Sequence, National Center for Biotechnology Information Reference Sequence [NCBI GenBank accession numbers are given when no ref. sequence is available]; Protein/Peptide Probability as determined by Scaffold (Proteome Software)

S1G - *Fusobacterium nucleatum* ssp.  $\dagger$ /*Fusobacterium periodonticum*

| Protein Name                                                 | NCBI Ref. Sequence                                                                                                                | Peptide Sequence                                                     | Best Peptide Probability | Best Protein Probability | Exclusive Unique Peptides |
|--------------------------------------------------------------|-----------------------------------------------------------------------------------------------------------------------------------|----------------------------------------------------------------------|--------------------------|--------------------------|---------------------------|
| <b>3-ketoacyl-CoA thiolase</b>                               | WP_008797581.1;<br>WP_008799181.1;<br>WP_008802473.1;<br>WP_005914415.1;<br>WP_005911138.1;<br>WP_029600142.1;<br>WP_005903642.1. | NILEETKVDPANIDEVIVGNVLSAGQAQGV<br>GR                                 | 99.70%                   | 100.00%                  | 3                         |
| <b>ABC transporter</b>                                       | WP_059223149.1;<br>WP_011016023.1;<br>WP_005895008.1;<br>WP_023040760.1;<br>WP_032847995.1.                                       | LITSVIVIVILWIQKQKDKR                                                 | 99.30%                   | 96.90%                   | 1                         |
| <b>ABC transporter permease</b>                              | WP_008700375.1.                                                                                                                   | IMLNIFLVLLVITLIQLIFLDRSSDIKMIILR<br><br>QKKALKIMLNIFLVLLVITLIQLIFLDR | 99.60%<br><br>99.60%     | 100.00%<br><br>100.00%   | 2<br><br>2                |
| <b>Acetyl-CoA acetyltransferase</b>                          | WP_029758534.1;<br>WP_005911138.1.                                                                                                | SAIGSFLGSLAPLPGDLGAQIVK                                              | 99.70%                   | 100.00%                  | 6                         |
| <b>Acetyl-CoA--acetoacetyl-CoA transferase subunit alpha</b> | WP_008798487.1;<br>WP_005909971.1;<br>WP_005906021.1;<br>WP_022069468.1;<br>WP_029597783.1;<br>WP_032838956.1.                    | NFNPLMATAADLVIVEALEVVPAGSLSEH<br>LDIR<br><br>VIASHIGTNAETGRR         | 99.70%<br><br>99.30%     | 100.00%<br><br>100.00%   | 12<br><br>8               |
| <b>Acyl-CoA dehydrogenase</b>                                | WP_008796823.1;<br>WP_005903799.1;<br>WP_023039674.1;<br>WP_005910603.1;<br>WP_008693325.1;<br>WP_005887888.1;<br>WP_032838542.1. | AIEQGYQALEVPEK                                                       | 99.70%                   | 100.00%                  | 8                         |



|                                                           |                                                                                                                                   |                                |        |         |    |
|-----------------------------------------------------------|-----------------------------------------------------------------------------------------------------------------------------------|--------------------------------|--------|---------|----|
| <b>Amino acid transporter LysE</b>                        | WP_005889891.1;<br>WP_005911766.1.                                                                                                | LIKIIKLANGIIFILALFVTVYSTRQIIIN | 99.60% | 100.00% | 2  |
| <b>Cation diffusion facilitator transporter</b>           | WP_008797291.1;<br>WP_005890180.1;<br>WP_005913304.1;<br>WP_008799415.1;<br>WP_008802633.1;<br>WP_023036054.1.                    | VEYSNITFILVVSIIKLLLGK          | 99.60% | 97.60%  | 1  |
| <b>Conjugal transfer protein Trbl</b>                     | WP_008799789.1.                                                                                                                   | KPISKIKTKNIIACGIAAVLMVALFR     | 99.40% | 96.90%  | 1  |
| <b>Diguanylate phosphodiesterase</b>                      | WP_005896091.1;<br>WP_005902564.1;<br>WP_011016360.1;<br>WP_032837436.1;<br>WP_008692845.1;<br>WP_008700001.1;<br>WP_020789089.1. | SLDPHASNDNPSSNVR               | 99.70% | 99.00%  | 6  |
| <b>DNA starvation/stationary phase protection protein</b> | WP_005896619.1;<br>WP_060496102.1;<br>WP_032888860.1;<br>WP_008794449.1;<br>WP_005898917.1.                                       | DFTIPEVVASIKEDMELMLADAR        | 99.70% | 98.10%  | 2  |
| <b>DNA starvation/stationary phase protection protein</b> | WP_008802732.1;<br>WP_008797196.1.                                                                                                | DFTIPEVIASIKEDMELMLADAK        | 99.70% | 98.10%  | 2  |
|                                                           |                                                                                                                                   | DFTIPEVIASIKEDMELMLADAKK       | 99.70% | 98.50%  | 2  |
| <b>DNA-binding protein</b>                                | WP_029758046.1;<br>WP_005909242.1.                                                                                                | LVNAFLETIEDALLK                | 99.70% | 99.00%  | 6  |
| <b>Electron transfer flavoprotein subunit alpha</b>       | WP_008795695.1;<br>WP_005906228.1.                                                                                                | ANFQLLEDLAAEIGGIVSASR          | 99.70% | 100.00% | 12 |
| <b>Electron transfer flavoprotein subunit alpha</b>       | WP_029757636.1;<br>WP_008797426.1;<br>WP_005903460.1;<br>WP_005890490.1;<br>WP_008795695.1;<br>WP_005913360.1;                    | DGILQNVGLELLGK                 | 99.70% | 100.00% | 14 |

|                                                                     |                                                                                                                                                                                            |                            |        |         |    |
|---------------------------------------------------------------------|--------------------------------------------------------------------------------------------------------------------------------------------------------------------------------------------|----------------------------|--------|---------|----|
|                                                                     | WP_005906228.1;<br>WP_008802554.1.                                                                                                                                                         |                            |        |         |    |
| <b>Glutamate dehydrogenase</b>                                      | WP_008691370.1.                                                                                                                                                                            | LTGEQNIGVFTGKPLTYGGSK      | 99.70% | 100.00% | 13 |
| <b>Glutamate dehydrogenase</b>                                      | WP_060676006.1;<br>WP_029758541.1;<br>WP_008691370.1;<br>WP_032838361.1.                                                                                                                   | SKETLNPLESGQQQVK           | 99.70% | 100.00% | 7  |
|                                                                     |                                                                                                                                                                                            |                            |        |         |    |
| <b>Hemolysin D</b>                                                  | WP_005903417.1;<br>WP_029597148.1.                                                                                                                                                         | LKFIILLIVLGLIYFTHR         | 99.30% | 97.70%  | 1  |
|                                                                     |                                                                                                                                                                                            | NIFKGKLFIIILLIVLGLIYFTHR   | 98.90% | 95.40%  | 1  |
| <b>Hemolysin D / efflux transporter periplasmic adaptor subunit</b> | WP_060798428.1;<br>WP_029598966.1;<br>WP_008798349.1;<br>WP_023041952.1;<br>WP_016339940.1;<br>WP_008691562.1;<br>WP_008795405.1;<br>WP_008701034.1;<br>WP_023039441.1;<br>WP_005908714.1. | GKLFIIILLIILGLIYFTHR       | 99.70% | 98.60%  | 1  |
|                                                                     |                                                                                                                                                                                            |                            |        |         |    |
| <b>Hypothetical protein</b>                                         | [EGN66372.1]                                                                                                                                                                               | LKKLFLSIFSLILIGYASLETLKISR | 99.50% | 97.60%  | 1  |
| <b>Hypothetical protein</b>                                         | [EGQ80340.1]                                                                                                                                                                               | NSKTLVRVILVLVVIVIGFYLIKR   | 99.10% | 97.10%  | 1  |
| <b>Hypothetical protein</b>                                         | [EGQ80481.1]                                                                                                                                                                               | LEEKIKFALEYLVVKVLITMVLLN   | 98.70% | 95.50%  | 1  |
| <b>Hypothetical protein</b>                                         | [EPC07777.1]                                                                                                                                                                               | QLLLIVIVIISYILINIQISM GK   | 99.40% | 96.80%  | 1  |
| <b>Hypothetical protein</b>                                         | WP_005903627.1;<br>WP_011016056.1.                                                                                                                                                         | MKKLLLGLFLLASALSFAAGR      | 98.80% | 95.20%  | 1  |
|                                                                     |                                                                                                                                                                                            |                            |        |         |    |
| <b>Hypothetical protein</b>                                         | WP_005904230.1.                                                                                                                                                                            | SKMESLIKLSGIIILIFIIYK      | 99.30% | 97.70%  | 1  |
| <b>Hypothetical protein</b>                                         | WP_008691669.1.                                                                                                                                                                            | VAPAIFLEATK                | 99.70% | 100.00% | 4  |

|                             |                                                                                                                                   |                             |        |        |   |
|-----------------------------|-----------------------------------------------------------------------------------------------------------------------------------|-----------------------------|--------|--------|---|
| <b>Hypothetical protein</b> | WP_008700013.1;<br>WP_060496225.1;<br>WP_029598725.1.                                                                             | NSLKIIEKIR                  | 99.70% | 98.70% | 1 |
| <b>Hypothetical protein</b> | WP_008797448.1;<br>WP_005889917.1.                                                                                                | WIFLILAIIIILIFGIKSCQR       | 99.50% | 97.80% | 1 |
| <b>Hypothetical protein</b> | WP_008797542.1;<br>WP_008799214.1;<br>WP_008802512.1;<br>WP_005912895.1.                                                          | MKRIFILLIVLLGLLVSCGK        | 99.30% | 96.30% | 1 |
| <b>Hypothetical protein</b> | WP_008799008.1;<br>WP_023041739.1;<br>WP_023038381.1;<br>WP_023039693.1;<br>WP_016340063.1;<br>WP_005910564.1;<br>WP_008795010.1. | MNSKTLIRIILIVIVIGFYLIKIR    | 99.60% | 98.00% | 1 |
| <b>Hypothetical protein</b> | WP_008799068.1;<br>WP_008701272.1.                                                                                                | LKTIVLVSPPELSSAYFIKIILEKR   | 99.50% | 97.80% | 1 |
| <b>Hypothetical protein</b> | WP_011016730.1.                                                                                                                   | GIILLYILIFLIVKNGILKGDSTIFR  | 98.70% | 95.50% | 1 |
| <b>Hypothetical protein</b> | WP_016339736.1.                                                                                                                   | YSKIFLAIIVVVSIIKIIRGIR      | 99.70% | 98.60% | 1 |
| <b>Hypothetical protein</b> | WP_020789205.1;<br>WP_008796996.1.                                                                                                | SIIFIVIFLGLGVIMGLITGVITSK   | 99.30% | 96.00% | 1 |
| <b>Hypothetical protein</b> | WP_023036497.1.                                                                                                                   | QGDAFVAFK                   | 99.50% | 97.50% | 1 |
| <b>Hypothetical protein</b> | WP_023036933.1.                                                                                                                   | DKILILSIVGIILLIIVIFLFMKNR   | 99.70% | 99.60% | 2 |
|                             |                                                                                                                                   | MDKILILSIVGIILLIIVIFLFMKNR  | 99.10% | 99.30% | 2 |
| <b>Hypothetical protein</b> | WP_023039392.1.                                                                                                                   | TYKYLKLLKILDVIIIIVIFFSNINK  | 98.60% | 95.10% | 1 |
| <b>Hypothetical protein</b> | WP_029599273.1;<br>WP_032841138.1;<br>WP_020789395.1.                                                                             | KIILILLFLLINIGVFSVHSHKKNLVR | 99.70% | 98.60% | 1 |

|                             |                                                                                                                                   |                                |        |         |    |
|-----------------------------|-----------------------------------------------------------------------------------------------------------------------------------|--------------------------------|--------|---------|----|
| <b>Hypothetical protein</b> | WP_029758616.1;<br>WP_005897113.1.                                                                                                | GHDWLKEDEYIAK                  | 95.20% | 99.10%  | 1  |
| <b>Hypothetical protein</b> | WP_059223007.1;<br>WP_005903860.1.                                                                                                | ENIFLILAFFILIFVAAIALKIRQR      | 99.50% | 98.20%  | 1  |
| <b>Hypothetical protein</b> | WP_060496462.1;<br>WP_005909975.1.                                                                                                | FGLRPGYAHNWSGHSNGGEGR          | 99.70% | 100.00% | 53 |
| <b>Hypothetical protein</b> | WP_060496462.1;<br>WP_032834443.1;<br>WP_005909975.1.                                                                             | ASYELYMLPTFQVSYKPTDFVK         | 99.70% | 100.00% | 45 |
|                             |                                                                                                                                   | ASYSVYMLPTFQVAYKPTDFVK         | 99.70% | 98.60%  | 1  |
|                             |                                                                                                                                   | LQTTANVNFTK                    | 99.70% | 100.00% | 20 |
| <b>Hypothetical protein</b> | WP_060676618.1;<br>WP_060676862.1;<br>WP_041461237.1;<br>WP_032840052.1;<br>WP_032839640.1;<br>WP_029757663.1;<br>WP_008691612.1. | GEEEPIADNATTEGR                | 99.70% | 99.00%  | 2  |
| <b>Hypothetical protein</b> | WP_060676711.1;<br>WP_023041864.1;<br>WP_023039782.1;<br>WP_005910878.1;<br>WP_060675827.1;<br>WP_032839248.1.                    | EAVQGTTAAPVANENK               | 99.70% | 100.00% | 14 |
| <b>Hypothetical protein</b> | WP_060798423.1;<br>WP_005900053.1;<br>WP_032837031.1.                                                                             | ENIFLILAFFILISLAAIALKIRHR      | 99.70% | 98.40%  | 1  |
| <b>Hypothetical protein</b> | WP_060797678.1;<br>WP_005909469.1.                                                                                                | EEEKPAEQPAATEQTTTAEAPK         | 99.70% | 100.00% | 10 |
| <b>Hypothetical protein</b> | WP_060798261.1;<br>WP_005897607.1;<br>WP_005910180.1.                                                                             | EEEKPAEQPAAEATAPATEAPATEAAAIAK | 99.70% | 100.00% | 23 |

|                                     |                                                                                                               |                             |        |         |    |
|-------------------------------------|---------------------------------------------------------------------------------------------------------------|-----------------------------|--------|---------|----|
| <b>LOS biosynthesis enzyme LBGB</b> | WP_005890447.1                                                                                                | KVYPYIKIGVVARGAAIDIIR       | 99.70% | 98.40%  | 1  |
| <b>Membrane antigen</b>             | WP_060797678.1;<br>WP_005905592.1;<br>WP_005909469.1                                                          | EGGVAAAEYFK                 | 99.70% | 100.00% | 10 |
| <b>Membrane protein</b>             | WP_008694349.1                                                                                                | NYQTLNTNKEEKDPITGK          | 99.70% | 100.00% | 8  |
| <b>Membrane protein</b>             | WP_008797071.1;<br>WP_023037361.1;<br>WP_023039195.1;<br>WP_005896265.1;<br>WP_008802885.1                    | DGGVAAAEYFK                 | 99.70% | 100.00% | 12 |
| <b>Membrane protein</b>             | WP_008800240.1                                                                                                | STDKGDSNADDDQVR             | 99.70% | 98.60%  | 2  |
| <b>Membrane protein</b>             | WP_011015959.1;<br>WP_005903305.1;<br>WP_023040702.1                                                          | KKIAFLFIFVLVLLIPLLEIKNLIDDR | 99.70% | 98.60%  | 1  |
| <b>Membrane protein</b>             | WP_011017017.1;<br>WP_008797071.1;<br>WP_008802885.1                                                          | KEEEKPAEQPAATTEAPATAEAPK    | 99.70% | 100.00% | 4  |
| <b>Membrane protein</b>             | WP_029599066.1;<br>WP_008797223.1;<br>WP_005890252.1;<br>WP_008799469.1;<br>WP_005912656.1;<br>WP_020788906.1 | TNKIIFYILLILVVISLIQLPFLDR   | 99.00% | 95.40%  | 1  |
| <b>Membrane protein</b>             | WP_029599475.1;<br>WP_008800240.1;<br>WP_008796594.1                                                          | DHNKYEVYMLPTFQVAYKPTDFVK    | 99.70% | 100.00% | 3  |
| <b>Membrane protein</b>             | WP_029758694.1;<br>WP_008694349.1;<br>WP_060496462.1                                                          | WAGHDSGVVGQPFVK             | 99.70% | 100.00% | 8  |
| <b>Membrane protein</b>             | WP_029758694.1;<br>WP_008694349.1;<br>WP_060496462.1                                                          | VIDNGSGYER                  | 99.70% | 100.00% | 14 |
| <b>Membrane protein</b>             | WP_005909975.1                                                                                                | EYVTFDGYNGGTNNK             | 99.70% | 100.00% | 50 |
|                                     |                                                                                                               | SEDTDKDWANSK                | 99.70% | 100.00% | 15 |

|                                                                        |                                                                                                                                                                         |                             |        |         |    |
|------------------------------------------------------------------------|-------------------------------------------------------------------------------------------------------------------------------------------------------------------------|-----------------------------|--------|---------|----|
| <b>Membrane protein [hypothetical protein]</b>                         | WP_011015959.1;<br>WP_005903305.1;<br>WP_023040702.1.                                                                                                                   | KIAFLFIFVLVLLIPLLELIKNLIDDR | 99.60% | 98.00%  | 1  |
| <b>Molecular chaperone DnaK</b>                                        | WP_005906171.1.                                                                                                                                                         | NAQAQQQAGAQANASSDENK        | 99.70% | 98.40%  | 1  |
| <b>Nickel transporter</b>                                              | WP_005911130.1;<br>WP_029598541.1;<br>WP_005903634.1;<br>WP_032838361.1;<br>WP_008691370.1;<br>WP_011016425.1.                                                          | DSGFTFEELEAAK               | 99.70% | 100.00% | 16 |
| <b>Nickel transporter</b>                                              | WP_060675608.1;<br>WP_005903852.1;<br>WP_032890213.1;<br>WP_008800088.1;<br>WP_005910197.1;<br>WP_008803296.1;<br>WP_005889025.1;<br>WP_032837038.1;<br>WP_032848328.1. | VAPGHNEIVPLNPNVNAWK         | 99.70% | 100.00% | 12 |
| <b>Outer membrane autotransporter barrel domain-containing protein</b> | WP_005910328.1;<br>WP_020992560.1.                                                                                                                                      | AMTTSGFAGLENAR              | 99.70% | 100.00% | 3  |
| <b>Peptide ABC transporter permease</b>                                | WP_008693282.1.                                                                                                                                                         | FIFKWLGIIFILSVITFLIVR       | 99.10% | 96.70%  | 1  |
| <b>Phenylalanine--tRNA ligase subunit alpha</b>                        | WP_011016059.1;<br>WP_041461262.1;<br>WP_032841095.1;<br>WP_029599218.1;<br>WP_005903621.1;<br>WP_005890222.1;<br>WP_020788884.1.                                       | INSLLDERNK                  | 98.80% | 95.30%  | 1  |
| <b>Serine/threonine protein kinase</b>                                 | WP_005902075.1.                                                                                                                                                         | KLAKIILNIVLILAIKLGSNIFQR    | 99.30% | 100.00% | 2  |
| <b>Transposase</b>                                                     | WP_011017157.1;<br>WP_054175325.1;<br>WP_011015897.1;<br>WP_005903793.1.                                                                                                | KNGETFSSLAK                 | 99.70% | 98.90%  | 8  |

|                                               |                                                                                             |                        |        |        |   |
|-----------------------------------------------|---------------------------------------------------------------------------------------------|------------------------|--------|--------|---|
| <b>Transposase</b>                            | WP_060676577.1;<br>WP_008798819.1;<br>WP_008795215.1;<br>WP_023038270.1;<br>WP_023039981.1. | YDFQKIVIR              | 99.60% | 98.30% | 3 |
| <b>tRNA (guanine-N(7)-)-methyltransferase</b> | WP_008694462.1.                                                                             | NYVLMIVPRHLERLPKIENLIK | 99.70% | 98.60% | 1 |

NCBI Ref. Sequence, National Center for Biotechnology Information Reference Sequence [NCBI GenBank accession numbers are given when no ref. sequence is available]; Protein/Peptide Probability as determined by Scaffold (Proteome Software); † *Fusobacterium nucleatum* ssp.: *Fusobacterium nucleatum* subsp. *nucleatum*, *Fusobacterium nucleatum* subsp. *polymorphum*, *Fusobacterium nucleatum* subsp. *vincentii*, *Fusobacterium nucleatum* subsp. *animalis*, sp. *CM1*, sp. *CM21*, sp. *CM22*.

S1G - *Streptococcus intermedius*

| Protein Name                                                             | NCBI Ref. Sequence                         | Peptide Sequence              | Best Peptide Probability | Best Protein Probability | Exclusive Unique Peptides |
|--------------------------------------------------------------------------|--------------------------------------------|-------------------------------|--------------------------|--------------------------|---------------------------|
| <b>CDP-diacylglycerol-glycerol-3-phosphate 3-phosphatidyltransferase</b> | WP_003075464.1;<br>WP_003077406.1.         | ENIPNALTLRLIALIPFILVLSLGH SIR | 99.70%                   | 98.60%                   | 1                         |
| <b>Hypothetical protein</b>                                              | WP_003077480.1.                            | VSIINLLLLIVGTVEIFHYFIVLTGLKDR | 99.10%                   | 96.00%                   | 1                         |
| <b>Hypothetical protein</b>                                              | [EKU16991.1]                               | IVVALVIGVILLGIAGKPQIHKMAR     | 99.70%                   | 100.00%                  | 5                         |
|                                                                          |                                            | SLFKKIVALVIGVILLGIAGKPQIHKMAR | 99.60%                   | 100.00%                  | 5                         |
| <b>Putative membrane protein</b>                                         | [EID83471.1;<br>BAM23756.1;<br>AGU75869.1] | IRLLLLSIALGFLSSFFLNLYTLGR     | 99.60%                   | 98.00%                   | 1                         |
| <b>YSIRK signal domain/LPXTG anchor domain surface protein</b>           | WP_003071367.1.                            | SSLGLTVLGLLGLSSAAILALIGMKRR   | 99.20%                   | 97.20%                   | 1                         |

NCBI Ref. Sequence, National Center for Biotechnology Information Reference Sequence [NCBI GenBank accession numbers are given when no ref. sequence is available]; Protein/Peptide Probability as determined by Scaffold (Proteome Software)



S1H - *Streptococcus oralis*

| Protein Name                                                       | NCBI Ref. Sequence                 | Peptide Sequence             | Best Peptide Probability | Best Protein Probability | Exclusive Unique Peptides |
|--------------------------------------------------------------------|------------------------------------|------------------------------|--------------------------|--------------------------|---------------------------|
| <b>Damage-inducible protein CinA</b>                               | WP_001103720.1.                    | LVVLIPFLVLLLLTGIKEDVLDGGSRRR | 99.00%                   | 95.40%                   | 1                         |
| <b>Glucan-binding protein C, partial</b>                           | [EJP21944.1]                       | LDPTATQGAETGK                | 99.70%                   | 100.00%                  | 6                         |
|                                                                    |                                    | SEVGTAYDTTDQR                | 99.70%                   | 100.00%                  | 4                         |
| <b>Gram-positive signal peptide protein, YSIRK family, partial</b> | [EIC78459.1]                       | KEIINKNLKK                   | 99.50%                   | 97.90%                   | 2                         |
| <b>Hypothetical protein</b>                                        | WP_000859476.1.                    | MKTVIALLVLILIGFWAINLKPRK     | 98.40%                   | 99.40%                   | 2                         |
| <b>Hypothetical protein</b>                                        | WP_001262749.1.                    | AALLQLLSEFLRELIKKFISWLK      | 99.20%                   | 95.60%                   | 1                         |
| <b>Hypothetical protein</b>                                        | WP_002880152.1.                    | DQFKWLNEK                    | 99.40%                   | 98.00%                   | 2                         |
| <b>Hypothetical protein</b>                                        | WP_042902462.1.                    | SEIQQWLGGK                   | 99.60%                   | 97.40%                   | 2                         |
| <b>Protease</b>                                                    | WP_049500151.1;<br>WP_000479681.1. | FLQILLVLLFLVVIASVIMVSSVYVVR  | 99.00%                   | 95.40%                   | 1                         |

NCBI Ref. Sequence, National Center for Biotechnology Information Reference Sequence [NCBI GenBank accession numbers are given when no ref. sequence is available]; Protein/Peptide Probability as determined by Scaffold (Proteome Software)

S1I - *Abiotrophia defectiva*

| Protein Name                                                                                               | NCBI Ref. Sequence | Peptide Sequence               | Best Peptide Probability | Best Protein Probability | Exclusive Unique Peptides |
|------------------------------------------------------------------------------------------------------------|--------------------|--------------------------------|--------------------------|--------------------------|---------------------------|
| <b>CAAX amino protease</b>                                                                                 | WP_035364307.1.    | KAIFLYLLGSLGQIWIISMIVFILR      | 99.60%                   | 98.30%                   | 1                         |
| <b>Cell envelope-like function transcriptional attenuator common domain protein [hypothetical protein]</b> | WP_035364821.1.    | ILAGRGYQFWVLGGLGAVLLLLILLNGLKR | 99.60%                   | 98.10%                   | 1                         |
| <b>DUF368 domain-containing protein</b>                                                                    | WP_023391108.1.    | QLDLVLIPIGLGGLATIILLSKLIER     | 99.30%                   | 97.70%                   | 1                         |
| <b>Hypothetical protein</b>                                                                                | WP_023391613.1.    | ALKKVLLASLALTCLAGPMVQAAPRIINIR | 99.60%                   | 97.90%                   | 1                         |
| <b>Hypothetical protein</b>                                                                                | WP_023391813.1.    | IKKSLILLCIPPLVLFINSLYR         | 95.40%                   | 95.40%                   | 1                         |
| <b>Hypothetical protein</b>                                                                                | WP_023391906.1.    | RFDLSKLNISLFLVLLAVLIGISQR      | 98.90%                   | 95.00%                   | 1                         |
| <b>Nrdi protein</b>                                                                                        | [ESK66283.1]       | MLKNLLKEVLKLLVVYLSITGQTR       | 99.60%                   | 100.00%                  | 3                         |
| <b>Twin arginine-targeting protein translocase TatA/E family</b>                                           | WP_023390673.1.    | MGLLRDIGAPGLILIVLGALLIFGPKR    | 99.10%                   | 97.00%                   | 1                         |

NCBI Ref. Sequence, National Center for Biotechnology Information Reference Sequence [NCBI GenBank accession numbers are given when no ref. sequence is available]; Protein/Peptide Probability as determined by Scaffold (Proteome Software)

**Table S2. Citrullinated peptides identified in untreated PMNs (provided as an Excel file).**

**Table S3. Citrullinated peptides identified in LtxA-treated PMNs (provided as an Excel file).**

**Table S4. Characteristics of healthy controls without periodontitis and patients with chronic periodontitis.**

|                                              | <b>No PD<br/>(n = 100)†</b> | <b>PD<br/>(n = 109)†</b> | <b>P</b> |
|----------------------------------------------|-----------------------------|--------------------------|----------|
| Age, years ( $\pm$ SD)‡                      | 35 $\pm$ 13                 | 49 $\pm$ 11              | <0.001   |
| Male gender, n (%)‡                          | 35 (35)                     | 64 (59)                  | <0.001   |
| Caucasian, n (%)‡                            | 74 (73)                     | 52 (52)                  |          |
| African American, n (%)‡                     | 13 (13)                     | 41 (41)                  |          |
| Other, n (%)‡                                | 12 (12)                     | 7 (7)                    | <0.001   |
| Bleeding on probing, % of sites ( $\pm$ SD)§ | 16 $\pm$ 19                 | 38 $\pm$ 22              | <0.001   |
| Pocket depth in mm, mean ( $\pm$ SD)§        | 2.0 $\pm$ 0.3               | 2.7 $\pm$ 0.5            | <0.001   |
| Clinical attachment level, mean ( $\pm$ SD)§ | 1.5 $\pm$ 0.7               | 2.5 $\pm$ 0.7            | <0.001   |
| Anti-LtxA positivity, n (%)                  | 11 (11)                     | 68 (62)                  |          |
| Anti-LtxA units, median (IQR)                | 2.3 (0.0-2.8)               | 24 (2.5-201)             | <0.001   |

†Smoking and diabetes mellitus were exclusion criteria in this study cohort.

‡Demographic information was available for 100/109 periodontitis patients (PD) and 99/100 controls (No PD).

§Clinical indices were available for 98/100 controls without periodontitis.

### Multiple regression model for log anti-LtxA

|          | <b>Beta (StdErr)</b> | <b>Linear<br/>P value</b> | <b>Rank<br/>P value</b> |
|----------|----------------------|---------------------------|-------------------------|
| PD Case* | 1.12 (0.12)          | <0.0001                   | <0.0001                 |

\*Adjusted for race (3 options), age, gender, study

**Table S5. Characteristics of RA patients by anti-LtxA antibody status.**

|                                         | No anti-LtxA<br>( <i>n</i> = 112) | Anti-LtxA +ve<br>( <i>n</i> = 84) | <i>P</i> |
|-----------------------------------------|-----------------------------------|-----------------------------------|----------|
| Age, years                              | 59 ± 8                            | 60 ± 9                            | 0.13     |
| Male gender, <i>n</i> (%)               | 44 (39)                           | 35 (42)                           | 0.74     |
| Caucasian, <i>n</i> (%)                 | 103 (92)                          | 65 (77)                           | 0.004    |
| African-American, <i>n</i> (%)          | 5 (5)                             | 13 (15)                           |          |
| Asian                                   | 3 (3)                             | 4 (5)                             |          |
| Hispanic                                | 1 (1)                             | 2 (2)                             |          |
| RA duration, years                      | 10 (4-17)                         | 8 (5-20)                          | 0.90     |
| RF seropositivity, <i>n</i> (%)         | 64 (57)                           | 65 (77)                           | 0.003    |
| Anti-CCP seropositivity, <i>n</i> (%)   | 82 (73)                           | 69 (82)                           | 0.14     |
| Anti-CCP units among pos., median (IQR) | 144 (93-182)                      | 145 (104-182)                     | 0.73     |
| ACPA seropositivity, <i>n</i> (%)       | 75 (67)                           | 69 (83)                           | 0.011    |
| DAS28, median                           | 3.5 (2.9-4.3)                     | 3.8 (2.9-4.3)                     | 0.59     |
| Swollen joint count, median             | 7 (3-10)                          | 7 (4-10)                          | 0.71     |
| Tender joint count, median              | 6 (2-12)                          | 6 (3-13)                          | 0.70     |
| Total SvdH score, median†               | 7 (0-32)                          | 12 (1-65)                         | 0.12     |
| Total erosion score, median†            | 2 (0-8)                           | 4 (0-22)                          | 0.077    |
| Total JSN score, median†                | 4 (0-20)                          | 6 (0-38)                          | 0.15     |
| Pain (100mm VAS), median                | 18 (7-32)                         | 24 (8-47)                         | 0.042    |
| Non-biologic DMARDs, <i>n</i> (%)       | 97 (87)                           | 68 (82)                           | 0.37     |
| Biologic DMARDs, <i>n</i> (%)           | 57 (51)                           | 32 (39)                           | 0.087    |
| Glucocorticoids, <i>n</i> (%)           | 44 (39)                           | 31 (37)                           | 0.73     |

†150 had interpretable radiographs at follow-up

Anti-LtxA, anti-Leukotoxin A antibodies, cut-off level for positivity >95<sup>th</sup> percentile of controls; RF, rheumatoid factor, cut-off for positivity >40 units; anti-CCP, anti-cyclic citrullinated peptide antibody, cut-off for positivity >20 units; ACPA, anti-citrullinated protein antibodies, any positivity by multiplex assay (ACPA fine specificities); DAS28, Disease Activity Score 28; DMARDs, disease-modifying antirheumatic drugs; JSN score, joint space narrowing score; SvdH score, Sharp/van der Heijde score; VAS, Visual Analogue Scale.

**Table S6. The association of shared epitope alleles with ACPAs and RF according to anti-*P. gingivalis* (*Pg*) antibody status.**

|                                       | Anti- <i>Pg</i> negative RA ( <i>n</i> = 123) |                                 |      |          | Anti- <i>Pg</i> positive RA ( <i>n</i> = 71) |                                 |      |          | <i>P</i> -<br><i>interaction</i> |
|---------------------------------------|-----------------------------------------------|---------------------------------|------|----------|----------------------------------------------|---------------------------------|------|----------|----------------------------------|
|                                       | SE negative<br>( <i>n</i> = 36)               | SE positive<br>( <i>n</i> = 87) | OR   | <i>P</i> | SE negative<br>( <i>n</i> = 22)              | SE positive<br>( <i>n</i> = 49) | OR   | <i>P</i> |                                  |
| <b>Anti-CCP positivity, %</b>         |                                               |                                 |      |          |                                              |                                 |      |          |                                  |
| Crude prevalence (95% CI)             | 56 (39, 71)                                   | 85 (76, 91)                     | 4.55 | 0.001    | 64 (42, 81)                                  | 86 (73, 93)                     | 3.43 | 0.041    | 0.71                             |
| Adjusted* prevalence (95% CI)         | 58 (40, 74)                                   | 89 (80, 94)                     | 5.71 | <0.001   | 65 (40, 84)                                  | 87 (73, 94)                     | 3.45 | 0.071    | 0.55                             |
| <b>ACPA positivity, %<sup>†</sup></b> |                                               |                                 |      |          |                                              |                                 |      |          |                                  |
| Crude prevalence (95% CI)             | 61 (45, 75)                                   | 77 (67, 84)                     | 2.10 | 0.082    | 68 (47, 84)                                  | 82 (68, 90)                     | 2.07 | 0.22     | 0.99                             |
| Adjusted* prevalence (95% CI)         | 64 (46, 78)                                   | 79 (69, 87)                     | 2.18 | 0.081    | 64 (41, 83)                                  | 81 (66, 90)                     | 2.31 | 0.18     | 0.94                             |
| <b>RF positivity, %</b>               |                                               |                                 |      |          |                                              |                                 |      |          |                                  |
| Crude prevalence (95% CI)             | 64 (47, 78)                                   | 79 (70, 87)                     | 2.17 | 0.076    | 73 (51, 87)                                  | 88 (75, 94)                     | 2.69 | 0.13     | 0.78                             |
| Adjusted* prevalence (95% CI)         | 68 (51, 82)                                   | 83 (73, 90)                     | 2.26 | 0.082    | 77 (52, 91)                                  | 88 (75, 95)                     | 2.31 | 0.25     | 0.98                             |

<sup>†</sup>Any ACPA fine specificity (see Table 1)

Anti-*Pg*, anti-*P. gingivalis* antibodies as determined by ELISA, cut-off for positivity >95<sup>th</sup> percentile of healthy controls without periodontitis; anti-CCP, anti-cyclic citrullinated peptide antibody, cut-off for positivity >20 units; ACPA, anti-citrullinated protein antibodies, any positivity by multiplex assay as previously defined (X); RF, rheumatoid factor, cut-off for positivity >40 units; SE, HLA-DRB1 shared epitope allele

\*Adjusted for age, Caucasian race, current smoking, IL-6, pain severity, and biologic use
